# Supplementary material for: GolpHCat (TMEM87A), a unique voltage-dependent cation channel in Golgi apparatus, contributes to Golgi-pH maintenance and hippocampus-dependent memory
Source: PubMed Central journal article supplement (PMC11239671; doi:10.1038/s41467-024-49297-8), 2024-07-11
Supplement: 41467_2024_49297_MOESM1_ESM.pdf [file 41467_2024_49297_MOESM1_ESM.pdf]

## Supplementary Information

### **GolpHCat (TMEM87A), a unique voltage-dependent cation channel in Golgi apparatus, contributes to Golgi-pH maintenance and hippocampus-dependent memory**

Hyunji Kang,<sup>1,2,7</sup> Ah-reum Han,<sup>3,7</sup> Aihua Zhang,<sup>4,7</sup> Heejin Jeong,<sup>5</sup> Wuhyun Koh,<sup>1</sup> Jung Moo Lee,<sup>1</sup> Hayeon Lee,<sup>1</sup> Hee Young Jo,<sup>5</sup> Miguel A. Maria-Solano,<sup>4</sup> Mridula Bhalla,<sup>1</sup> Jea Kwon,<sup>1</sup> Woo Suk Roh,<sup>1</sup> Jimin Yang,<sup>3</sup> Hyun Joo An,<sup>5</sup> Sun Choi,<sup>4,\*</sup> Ho Min Kim,<sup>3,6,\*</sup> C. Justin Lee<sup>1,2,8,\*</sup>

<sup>7</sup> These authors contributed equally: Hyunji Kang, Ah-reum Han, Aihua Zhang

\*Correspondence: [cjl@ibs.re.kr](mailto:cjl@ibs.re.kr) (C.J.L.), [hm\\_kim@kaist.ac.kr](mailto:hm_kim@kaist.ac.kr) (H.M.K.), [sunchoi@ewha.ac.kr](mailto:sunchoi@ewha.ac.kr) (S.C.)

#### **This file includes:**

**Supplementary Figures 1-9 and Legends**

**Supplementary Tables 1-5**

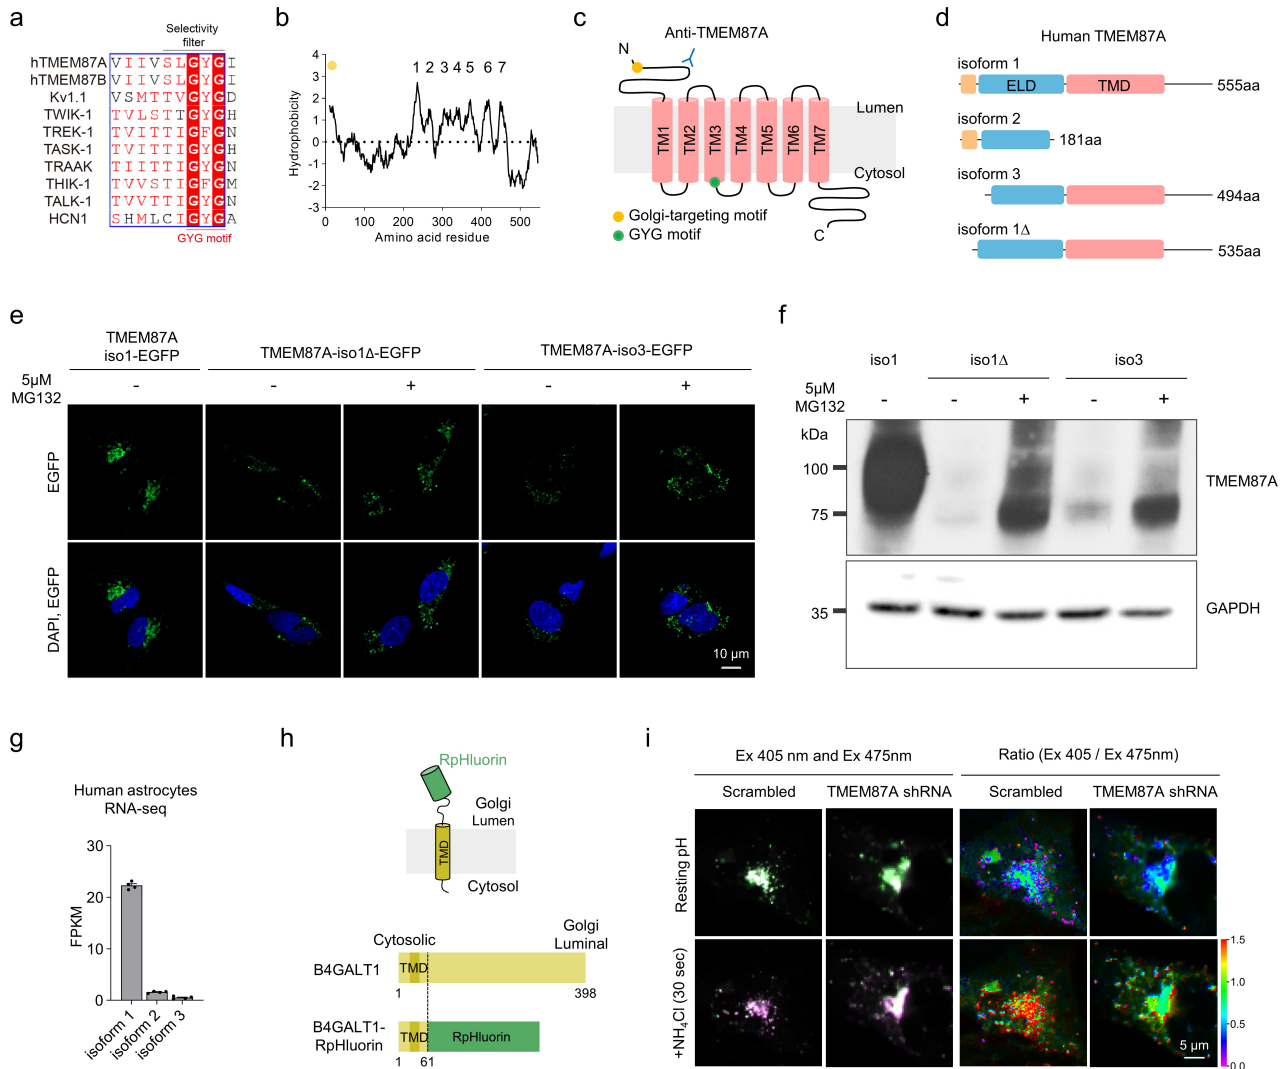

## Supplementary Fig.1 | Golgi signal sequence in N-terminal of TMEM87A and Golgi pH regulation of TMEM87A

- a**, Partial sequence alignment for the selectivity filter of the K<sup>+</sup> channel family with hTMEM87A/B.
- b**, Hydrophobicity plot of hTMEM87A. Yellow circle indicates a predicted Golgi signal sequence site.
- c**, A predicted seven-transmembrane (TM) topology of TMEM87A within the Golgi lumen. Anti-TMEM87A indicates epitope for TMEM87A antibody. A green circle indicates a GYG motif sequence.
- d**, Proteins of human TMEM87A. ELD, extracellular domain; TMD, transmembrane domain; ss, signal sequence; isoform 1 Δss, ss deleted isoform 1.
- e**, Localization of C-terminal EGFP-tagged TMEM87A isoforms (iso1, isoΔ, iso3) in cultured human astrocytes in the absence or presence of 5μM MG132. Representative figures were obtained from three independent experiment.
- f**, Western blot analysis depicting the expression levels of EGFP-tagged TMEM87A isoforms (iso1, isoΔ, iso3) in cultured human astrocytes under conditions of both absence and presence of 5μM MG132. Representative figures were obtained from three independent experiment.

- g**, Transcriptome analysis of TMEM87A isoforms using RNA-seq in cultured human astrocytes (n=3cells).
- h**, Full length of B4GALT1 (left top). Constructs of B4GALT1 TMD-fused RpHluorin to target RpHluorin in the Golgi lumen (left bottom). Schematic diagram of used construct 'B4GALT1-RpHluorin' for measuring pH of Golgi lumen (right).
- i**. Representative merged fluorescence images illuminated with two excitation 405nm and 475nm with 50 mM NH<sub>4</sub>Cl treat before and after in Scrambled (n=14cells) or TMEM87A shRNA (n=18cells) transfected cultured human astrocytes (left). Representative fluorescence ratio (ex 405nm/ex 475nm) images (right).

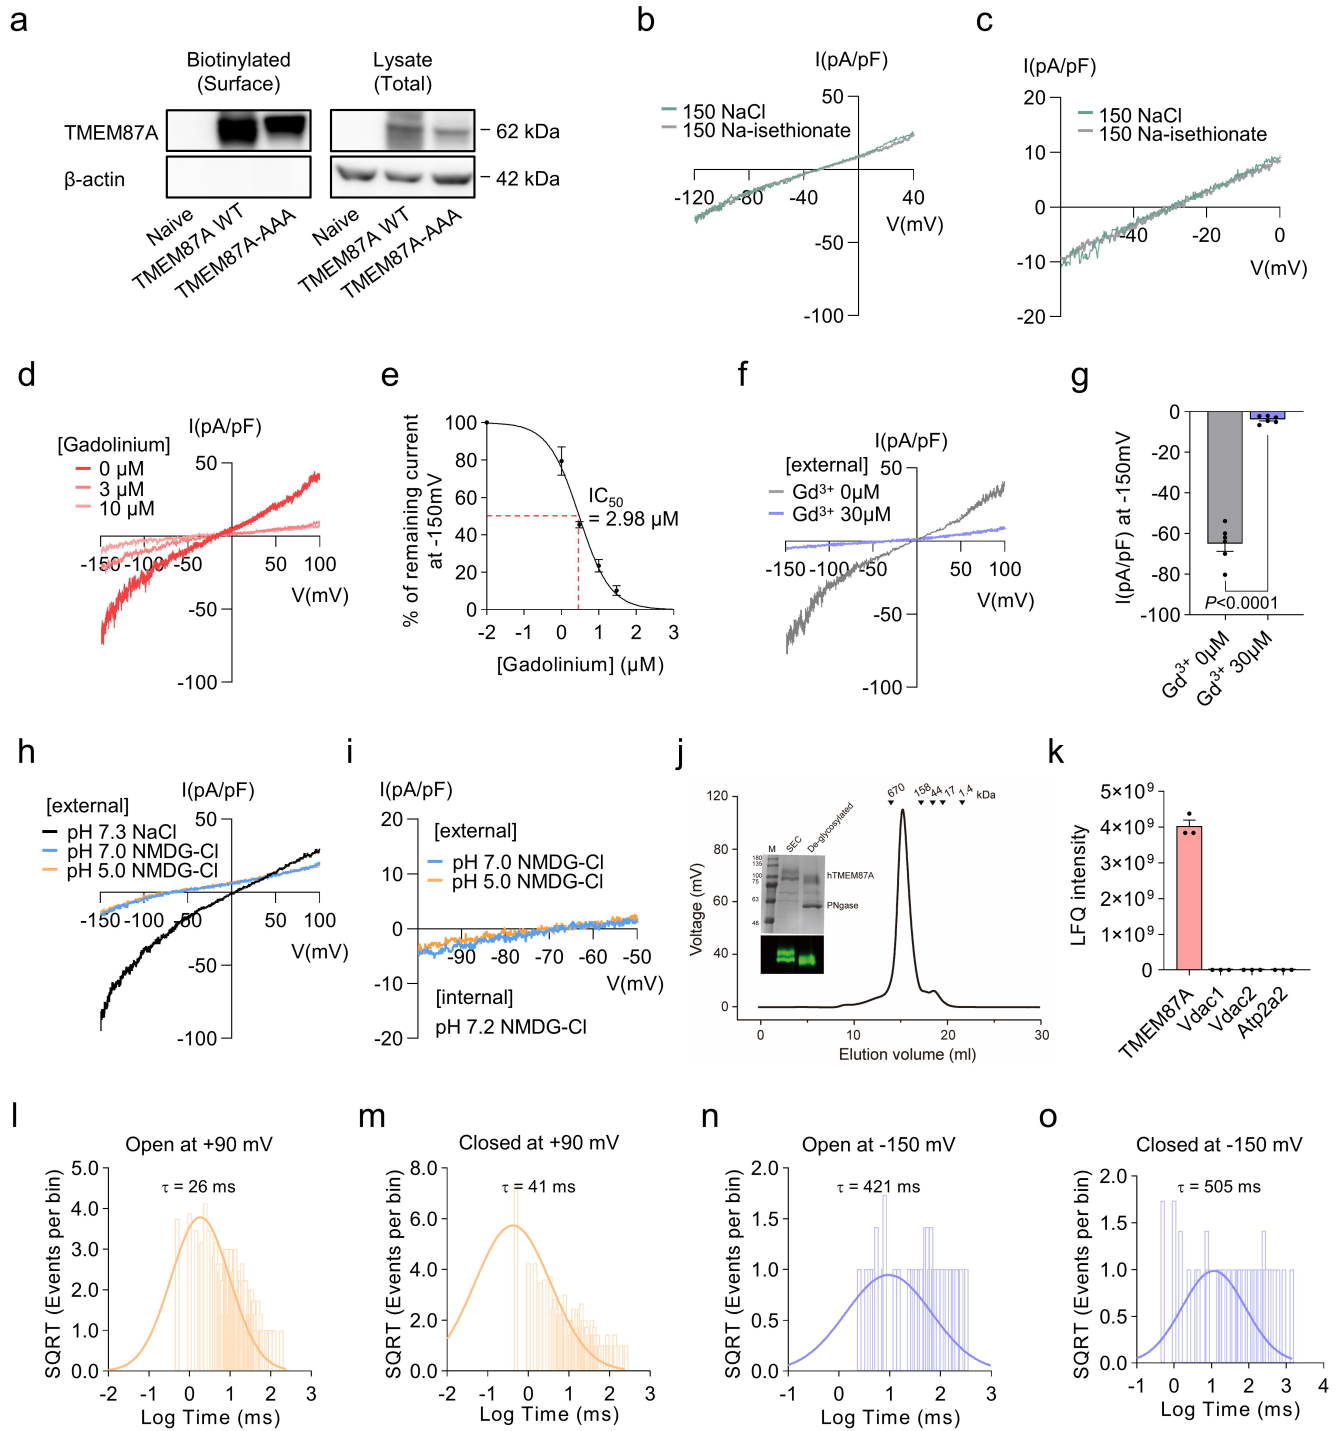

### Supplementary Fig.2 | Electrophysiological characterization of TMEM87A

**a**, Surface biotinylation assay of TMEM87A WT and TMEM87A-AAA transfected cells blotted with TMEM87A antibody.

**b**, Representative I-V relationship from TMEM87A WT transfected cells under replacing the bath solution NaCl to Na-isethionate. The currents were corrected by liquid junction potential (LJP), respectively. (NaCl, green; Na-isethionate, gray; n=3cells).

- c**, Magnified trace for reversal potential from (b) (n=3cells).
- d**, Representative I-V relationship from TMEM87A WT transfected cell (n=5cells) with gadolinium in the bath solution.
- e**, Dose-response curve for percentage currents at -150 mV for gadolinium (0, 1, 3, 10, and 30  $\mu$ M) (n=5cells).
- f**, Representative I-V relationship from mouse TMEM87A WT transfected cells (n=6cells) under bath solution without ( $Gd^{3+}$  0  $\mu$ M) or with 30  $\mu$ M gadolinium ( $Gd^{3+}$  30  $\mu$ M).
- g**, Current densities measured at -150mV from (f) (n=6cells).
- h**, Representative I-V relationship from TMEM87A WT transfected cells under replacing the bath solution pH 7.3 NaCl to pH 7.0 and 5.0 NMDG-Cl. (pH 7.3 NaCl, black; pH 7.0 NMDG-Cl, blue; pH 5.0 NMDG-Cl, orange; n=3cells).
- i**, Magnified trace for reversal potential from (h) (n=3cells).
- j**, Size-exclusion chromatography (SEC) profile of hTMEM87A-EGFP-Twin-strep. Inset: SDS-PAGE analysis of hTMEM87A-EGFP-Twin-strep after PNGase F treatment (n=3hippocampal samples).
- k**, Bar graph of LFQ intensity of TMEM87A and other pore-forming ion channels involved in TMEM87A purified solution.
- l,m**, Dwell time histograms of TMEM87A single channel unitary current activities at +90 mV for open in **l** and closed in **m** states (n=3). Data are fitted with a log-normal distribution.
- n,o**, Dwell time histograms of TMEM87A single channel unitary current activities at -150 mV for open in **n** and closed in **o** states (n=3). Data are fitted with a log-normal distribution.

Data are presented as the mean  $\pm$  SEM. Statistical analyses were performed using Mann-Whitney test in (g). Source data and exact p values are provided as a Source Data file.

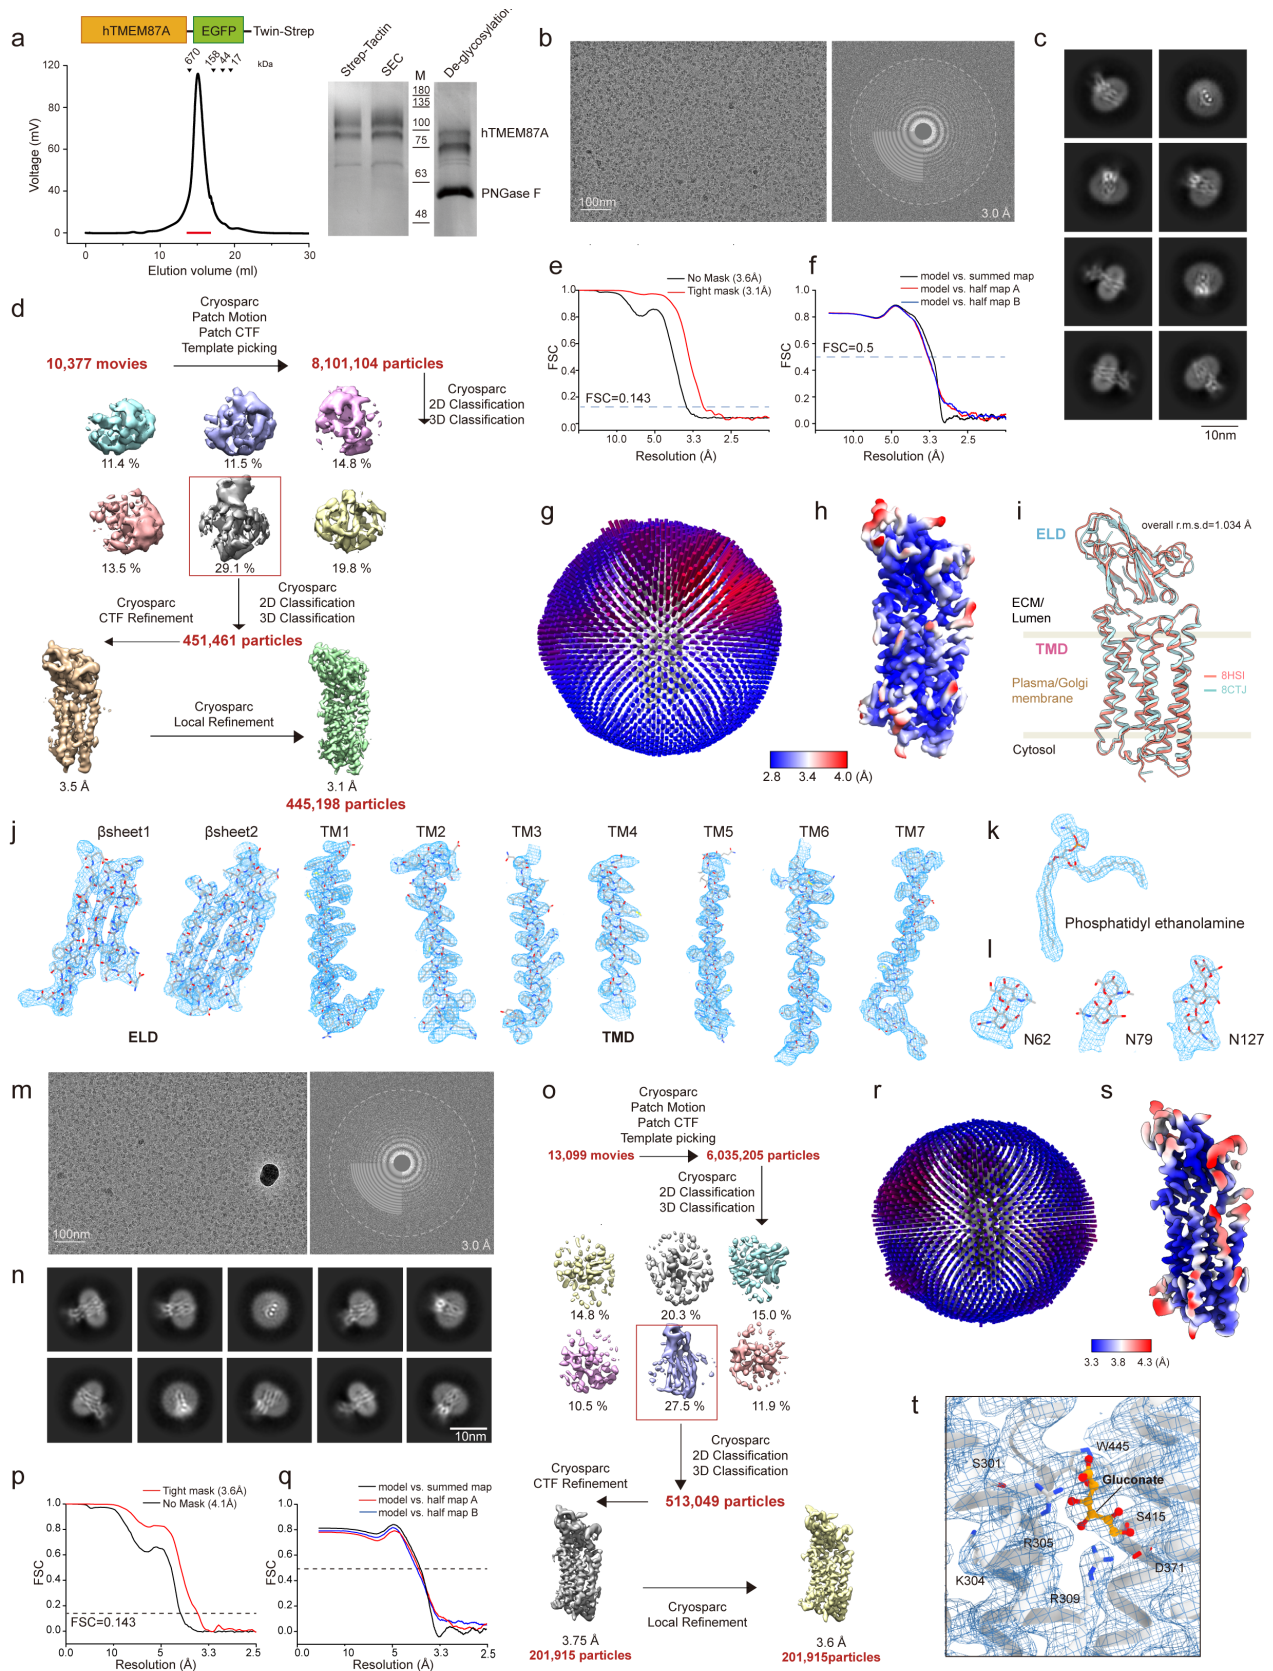

Supplementary Fig.3 | Purification and Cryo-EM analysis of hTMEM87A and hTMEM87A-Gluc

- a**, Expression construct and size-exclusion chromatography (SEC) profile of hTMEM87A-EGFP-Twin-strep (left). Full-length hTMEM87A (M1~E555) with a cleavable C-terminus EGFP-tag and a Twin-strep tag was expressed in Expi293F cells, solubilized with n-dodecyl  $\beta$ -D-maltoside (DDM) and cholesteryl hemisuccinate (CHS), and purified hTMEM87A by Strep-Tactin affinity purification and SEC in lauryl maltose neopentyl glycol (LMNG) and CHS. Pooled fractions for cryo-EM analysis are marked with the red bar. Coomassie blue stained SDS-PAGE gel of the elution fractions from Strep-Tactin affinity purification and the SEC peak fractions, respectively (middle). SDS-PAGE analysis of hTMEM87A-EGFP-Twin-strep after PNGase F treatment (right). Homogeneous peak fractions containing hTMEM87A-EGFP-Twin-strep protein (hTMEM87A) without proteolytic cleavage were used for structural studies.
- b**, Representative cryo-EM micrograph (left) and its Fourier transform (right).
- c**, Representative 2D class averages of hTMEM87A.
- d**, Data processing workflow of cryo-EM analysis of hTMEM87A.
- e**, Fourier shell correlation (FSC) curves between two independently refined half maps in cryoSPARC (left, resolution cutoff at FSC = 0.143)
- f**, FSC curves for cross-validation of a model (right, resolution cutoff at FSC = 0.5).
- g**, Euler angle distribution of all particles used in the final 3D reconstructions. The cylinder bars' height and color (from blue to red) are proportional to the number of particles in those views.
- h**, Final cryo-EM map of hTMEM87A colored with local resolution.
- i**, Comparison of two cryo-EM structures of hTMEM87A. Structure of hTMEM87A in detergent LMNG/CHS (light orange, our structure PDB:8HSI) and previously reported structure of hTMEM87A in Nanodisc (light blue, Hoel et al.'s PDB: 8CTJ) are superimposed. The overall architecture of the two structures is similar (overall r.m.s.d.=1.034Å).
- j**, Cryo-EM map and model from hTMEM87A.  $\beta$ sheet1 ( $\beta$ 1, D38-S48;  $\beta$ 3, N62-E72;  $\beta$ 7, N204-P215, contour level = 0.142) and  $\beta$ sheet2 ( $\beta$ 2, G49-F60;  $\beta$ 4, L76-D88;  $\beta$ 5, L117-Q126,  $\beta$ 6, A180-S192, contour level = 0.129) of ELD. Seven helices of TMD (TM1, E222-L256, contour level = 0.101; TM2, R257-E288, contour level = 0.101; TM3, V290-V322, contour level = 0.101; TM4, V333-G354, contour level = 0.101; TM5, Q356-R393, contour level = 0.101; TM6, N394-I428, contour level = 0.101; and TM7, S433-P473, contour level = 0.101).
- k**, Cryo-EM map and model of the phosphatidylethanolamine (contour level = 0.101).
- l**, Cryo-EM map and model of three N-linked oligosaccharides (N62, contour level = 0.0805; N79, contour level = 0.0805; and N127, contour level = 0.0805).
- m**, Representative cryo-EM micrograph (left) and its Fourier transform (right) of the hTMEM87A-Gluc.
- n**, Representative 2D class averages of hTMEM87A-Gluc.
- o**, Data processing workflow of cryo-EM analysis of hTMEM87A-Gluc.
- p**, Fourier shell correlation (FSC) curves between two independently refined half maps in cryoSPARC (left, resolution cutoff at FSC = 0.143).
- q**, FSC curves for cross-validation of a model (right, resolution cutoff at FSC = 0.5).
- r**, Euler angle distribution of all particles used in the final 3D reconstructions. The cylinder bars' height and color (from blue to red) are proportional to the number of particles in those views.
- s**, Final cryo-EM map of hTMEM87A-Gluc colored with local resolution.
- t**, Cryo-EM map and model of hTMEM87A-Gluc in Glutamate-binding site (contour level = 0.125). Glutamate and interacting residues are shown as sticks and labeled.

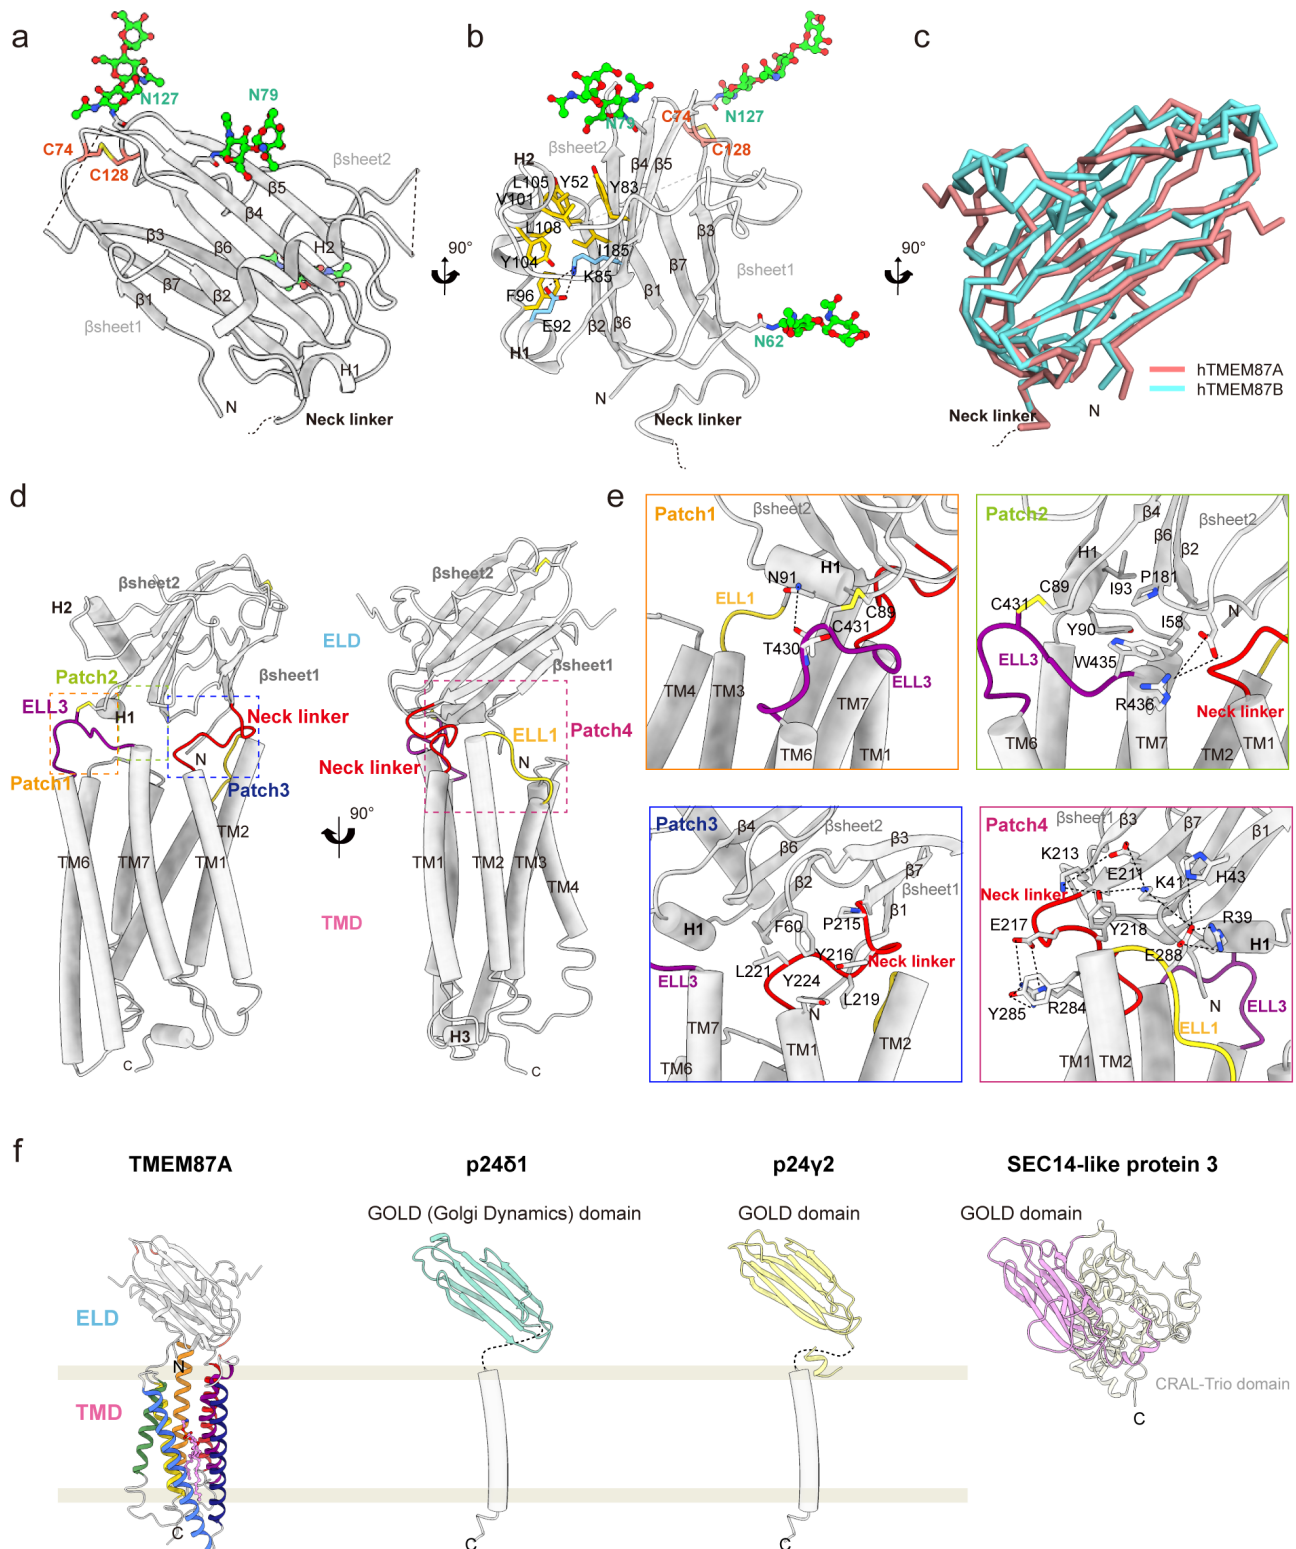

### Supplementary Fig.4 | Structure of hTMEM87A ELD

**a**, Structure of hTMEM87A ELD. The structure is shown as a cartoon and colored in light gray. The ELD resembles a  $\beta$ -sandwich fold connected to the first TMD helix by a linker (termed a neck linker, G214-D223) and is composed of seven anti-parallel  $\beta$ -strands ( $\beta$ 1,  $\beta$ 3,  $\beta$ 7 for  $\beta$ sheet1 and  $\beta$ 2,  $\beta$ 4,  $\beta$ 5,  $\beta$ 6 for  $\beta$ sheet2) and two short  $\alpha$ -helices



- (H1 and H2). The glycosylation site (N62, N79, and N127) and disulfide bridge (C74-128) are indicated. Two conserved cysteines (C74 and C128) form a disulfide bond that bridges a long loop between  $\beta 5$  and  $\beta 6$  to a neighboring loop between  $\beta 3$  and  $\beta 4$ . Disulfide bridge (yellow) and N-linked glycans (green) are shown as sticks. Disordered regions were indicated as dashed lines.
- b**, Detail interactions of two short  $\alpha$ -helices (H1 and H2) with the outer surface of  $\beta$ sheet2. Key interacting residues are displayed as sticks and labeled (ionic 5 interaction: sky blue, hydrophobic interactions: yellow). The H1 and H2 located between  $\beta 4$  and  $\beta 5$  of ELD interacts with the outer surface of  $\beta$ sheet2 through long-range hydrophobic networks (I93, F96, V101, Y104, L105, and L108 on H1 and H2; Y52, Y83, Y118, I183 and I185 on  $\beta$ sheet2) and electrostatic interaction (K85-E92). N-linked glycans (N62, N79, and N127) are shown as green sticks.
  - c**, Superimposition of hTMEM87A ELD (salmon) with the hTMEM87B ELD (cyan, NP\_116213.1, E45-S212), whose structure is predicted by AlphaFold. The calculated C $\alpha$  root mean square deviation (R.M.S.D) is 2.24.
  - d**, Interaction interfaces between ELD and TMD. Four interaction patches are indicated by dotted box (patch1, orange; patch2, lime; patch3, blue; and patch4, magenta). Loops involving interface interactions were highlighted (Neck linker: red, ELL1: yellow, and ELL3: purple).
  - e**, Close-up views of each interaction interface in (d). Key interacting residues are shown as sticks and labeled. Hydrogen and ionic bonds are indicated as a dashed line.
  - f**, Structural comparison of the hTMEM87A ELD with other Golgi dynamics (GOLD) domain-containing proteins [p24 $\delta$ 1 (PDB: 5AZX, light teal), p24 $\gamma$ 2 (PDB:5GU5, pale yellow), and SEC14-like protein 3 (PDB: 4UYB, light pink).

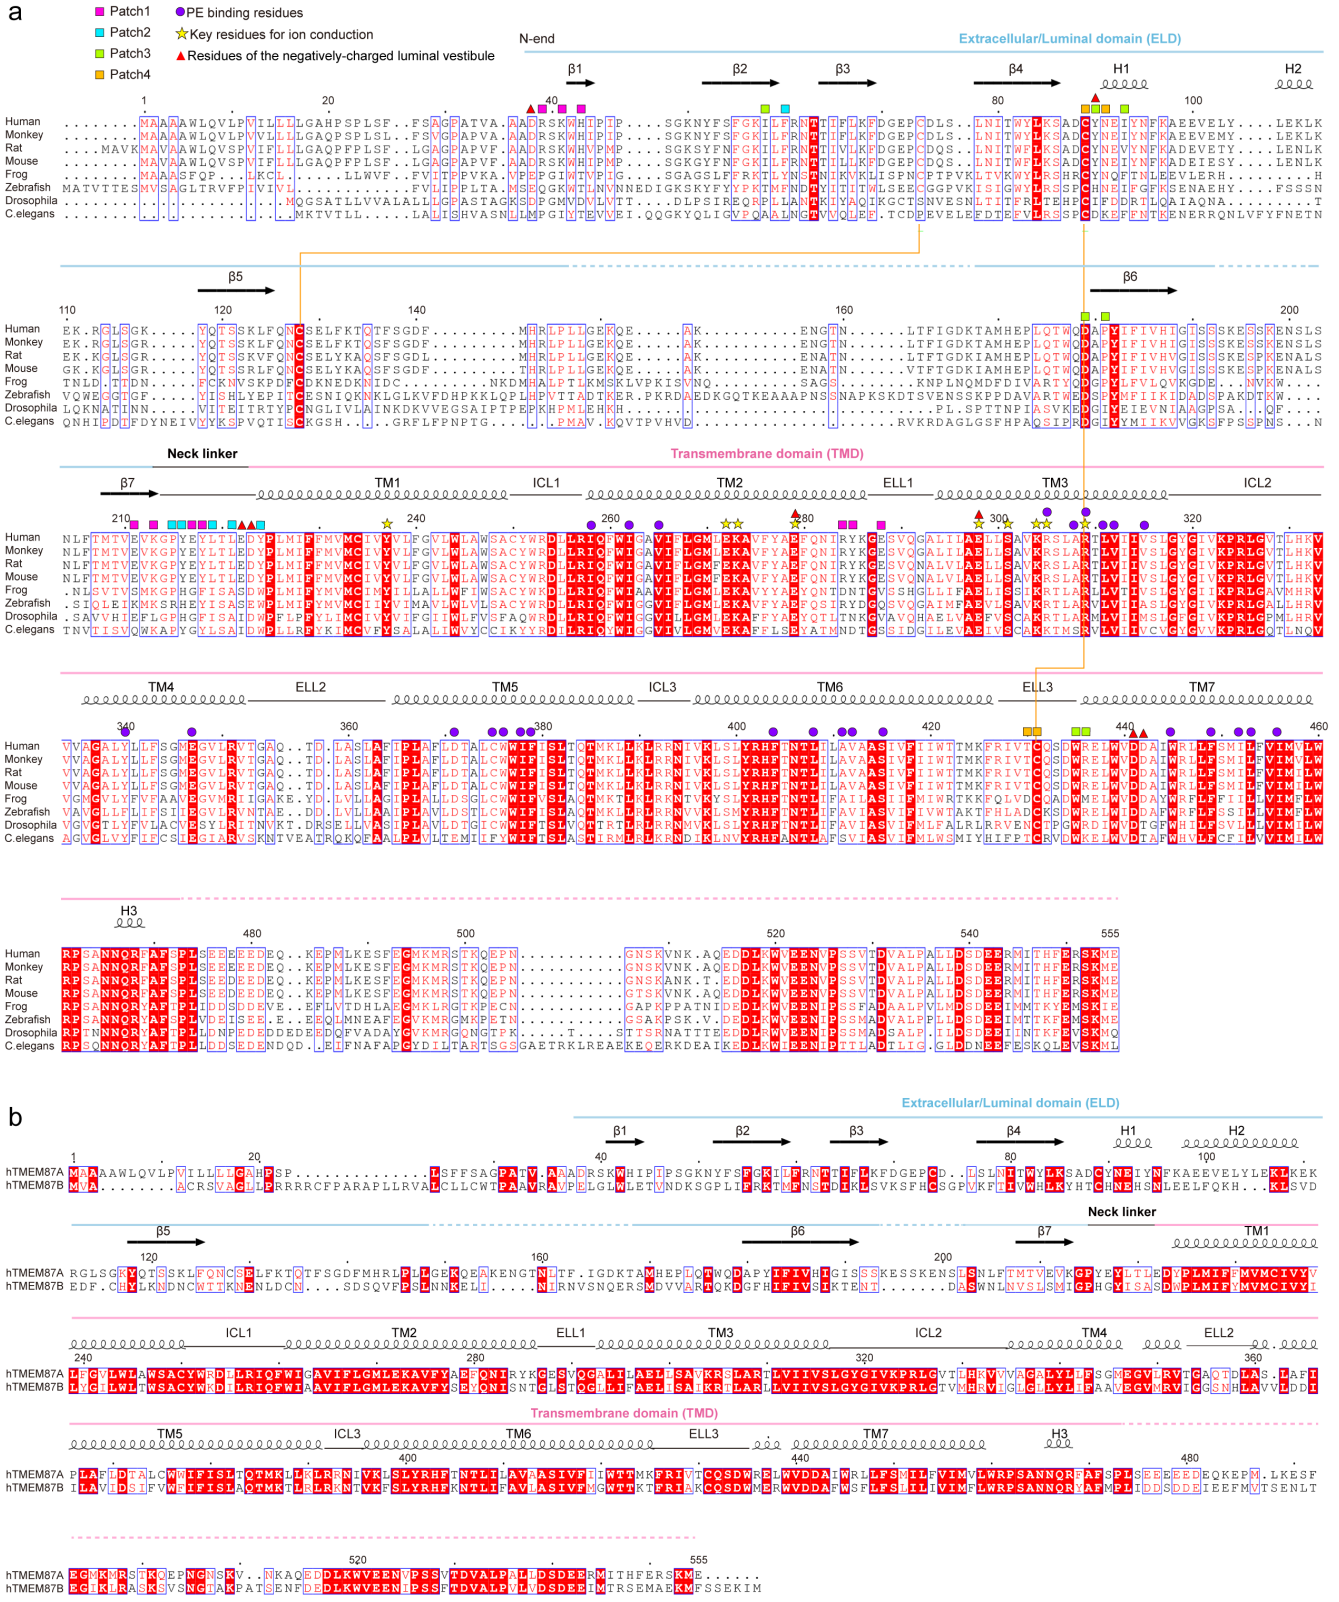

**Supplementary Fig.5 | Multiple sequence alignment of TMEM87A**

**a**, Amino acid sequence alignment of human (*Homo sapiens*, NP\_056312.2), monkey (*Chlorocebus sabaeus*,

XP\_008015094.1), rat (*Rattus norvegicus*, XP\_038962452.1), mouse (*Mus musculus*, NP\_776095.2), frog (*Xenopus tropicalis*, NP\_001016057.1), Zebrafish (*Danio rerio*, NP\_001082853.2), Fruit fly (*Drosophila melanogaster*, NP\_608612.3), Roundworm (*Caenorhabditis elegans*, NP\_508729.2). TMEM87A orthologs are obtained by ortholog search. Domains (ELD, TMD, N-end, and neck linker) and secondary structure elements (arrows for  $\beta$  stands and helices for  $\alpha$ -helices) are displayed above the alignment. Squares indicate interacting residues at the interface between ELD and TMD (patch1: orange, patch2: green, patch3: cyan, and patch4: magenta). Purple circles indicate interacting residues with phosphatidyl ethanolamine (PE). Yellow stars indicate key residues involved in ion conduction. Red triangles indicate residues consisting of the negatively-charged luminal vestibule. Disulfide bonds (orange lines) are also indicated. Red boxes indicate perfect sequence conservation, whereas blue-lined boxes show residues with >70% similarity based on physicochemical properties.

**b**, Amino acid sequence alignment of hTMEM87A and hTMEM87B (NP\_116213.1). Domains (ELD, TMD, N-end, and neck linker), secondary structure elements (arrows for  $\beta$  stands and helices for  $\alpha$ -helices), and disulfide bonds (orange lines) are displayed. Red boxes indicate perfect sequence conservation, whereas blue-lined boxes show residues with >70% similarity based on physicochemical properties.

The sequence alignment was created using Clustal Omega (<https://www.ebi.ac.uk/Tools/msa/clustalo/>) and EsPript 3.0 (<https://esript.ibcp.fr/ESPrpt/ESPrpt/>).

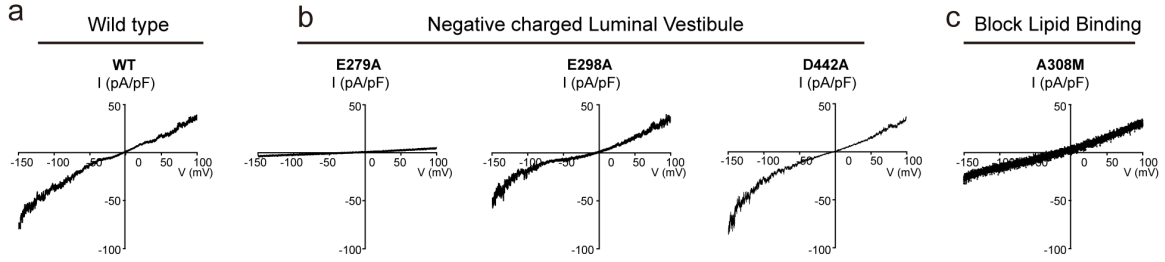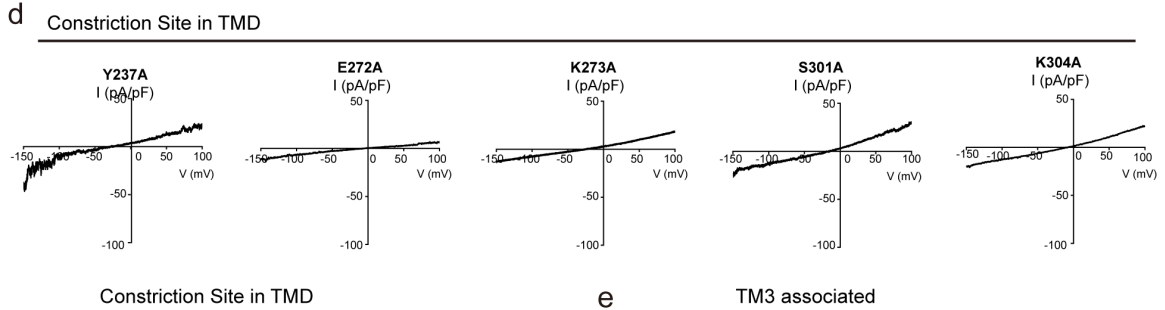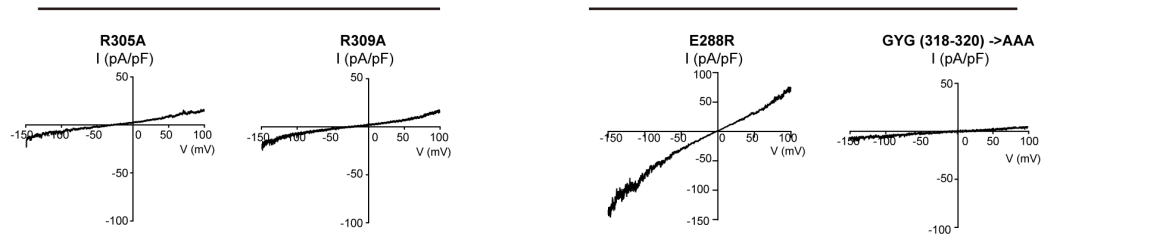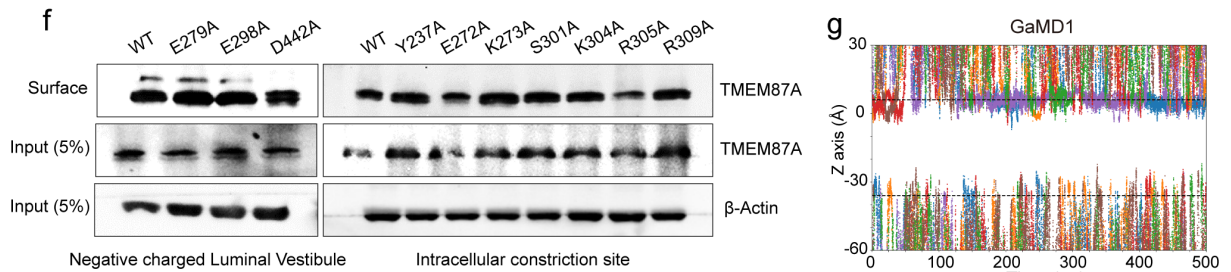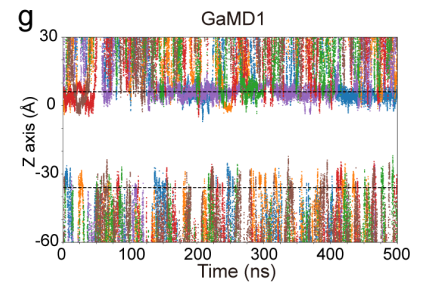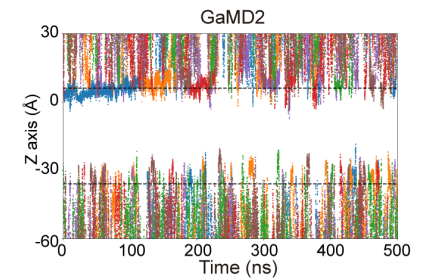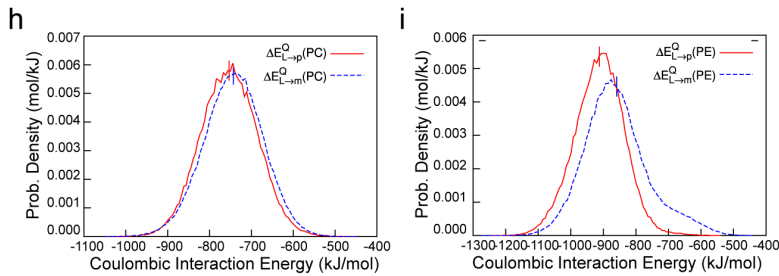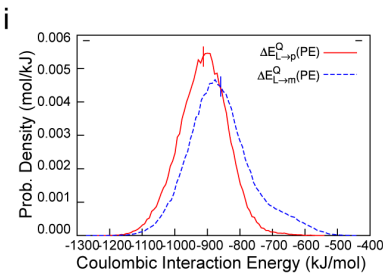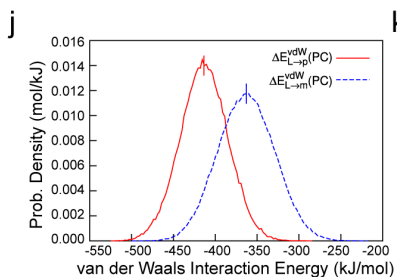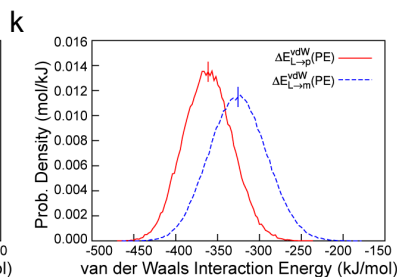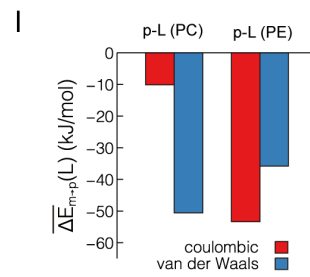

## Supplementary Fig.6 | Electrophysiology of hTMEM87A WT and mutants, and molecular dynamics simulations

**a-e**, Representative current-voltage (I-V) curves obtained in whole-cell configuration of hTMEM87A WT and its mutants. The currents were recorded with voltage-clamp ramp protocol descending from +100 mV to -150 mV.

**a**, Representative current-voltage (I-V) curves of hTMEM87A WT.

**b**, Representative I-V relationship of hTMEM87A mutants (E279A, E298A, and D442A) for NLV.

**c**, Representative I-V relationship of hTMEM87A mutants (A308M) for blocking lipid binding.

**d**, Representative I-V relationship of hTMEM87A mutants (Y237A, E272A, K273A, S301A, K304A, R305A, and R309A) for constriction site in TMD

**e**, Representative I-V relationship of hTMEM87A mutants (E288R and AAA) for TM3 associated.

**f**, Membrane expression of hTMEM87A WT and its mutant measured by surface biotinylation assay. HEK293A cells were transfected with hTMEM87A WT or its mutants (E279A, E298A, D442A, Y237A, E272A, K273A, S301A, K304A, R305A, R309A, S415F, and S415W), treated with biotin to isolate surface hTMEM87A proteins. Proteins were immunoblotted with TMEM87A antibodies (Novus). These results indicate that all of hTMEM87A mutants are expressed in the plasma membrane at a similar level.

**g**, Representation of the Z coordinates of the  $K^+$  atoms that bind in the negatively-charged luminal vestibule (NLV) along the GaMD simulations. The Z coordinates of the  $K^+$  atoms from each binding event are indicated by different colored dots. The black dashed lines correspond to the upper and lower boundaries of the lipid bilayer membrane calculated as the averaged Z coordinates of the nitrogen atoms of the PE and PC molecules. Note that for the GaMD simulation 3 none binding event is explored, while for GaMD simulation 1 and 2 we explore 6 binding events each. When the binding takes place, the  $K^+$  explores the NLV region (ca. 0-10 Z axis values) for a relatively long period of time.

**h-k**, The distributions of coulombic and van der Waals interaction energies for the PE/PC binding with hTMEM87A (solid lines) and for the PE/PC binding in a mixed lipid bilayer membrane (PC: PE=3:1) (dashed lines). The average interaction energies are marked by the vertical lines. Five 1  $\mu$ s trajectories were simulated in the solvated system ( $S_{p-L}$ ), where hTMEM87A structures containing either lipid (PC or PE) bound to the TMD cavity were embedded in a simple Golgi model membrane (PC:PE=3:1). The results showed that the van der Waals interaction energy of PC is increased due to the additional methyl groups, while its coulombic interaction energy decreased because of their screening effect.

**l**, Comparing average coulombic/van der Waals interaction energies of PE/PC transferring from membrane to protein. The transferring interaction energies are calculated as the differences between the average interaction energies in the b-e plots. The binding free energies in the main text can be calculated according to the LIE formula, with 0.5 and 0.16 being the coefficients for the coulombic/van der Waals contributions, respectively. Source data are provided as a Source Data file.

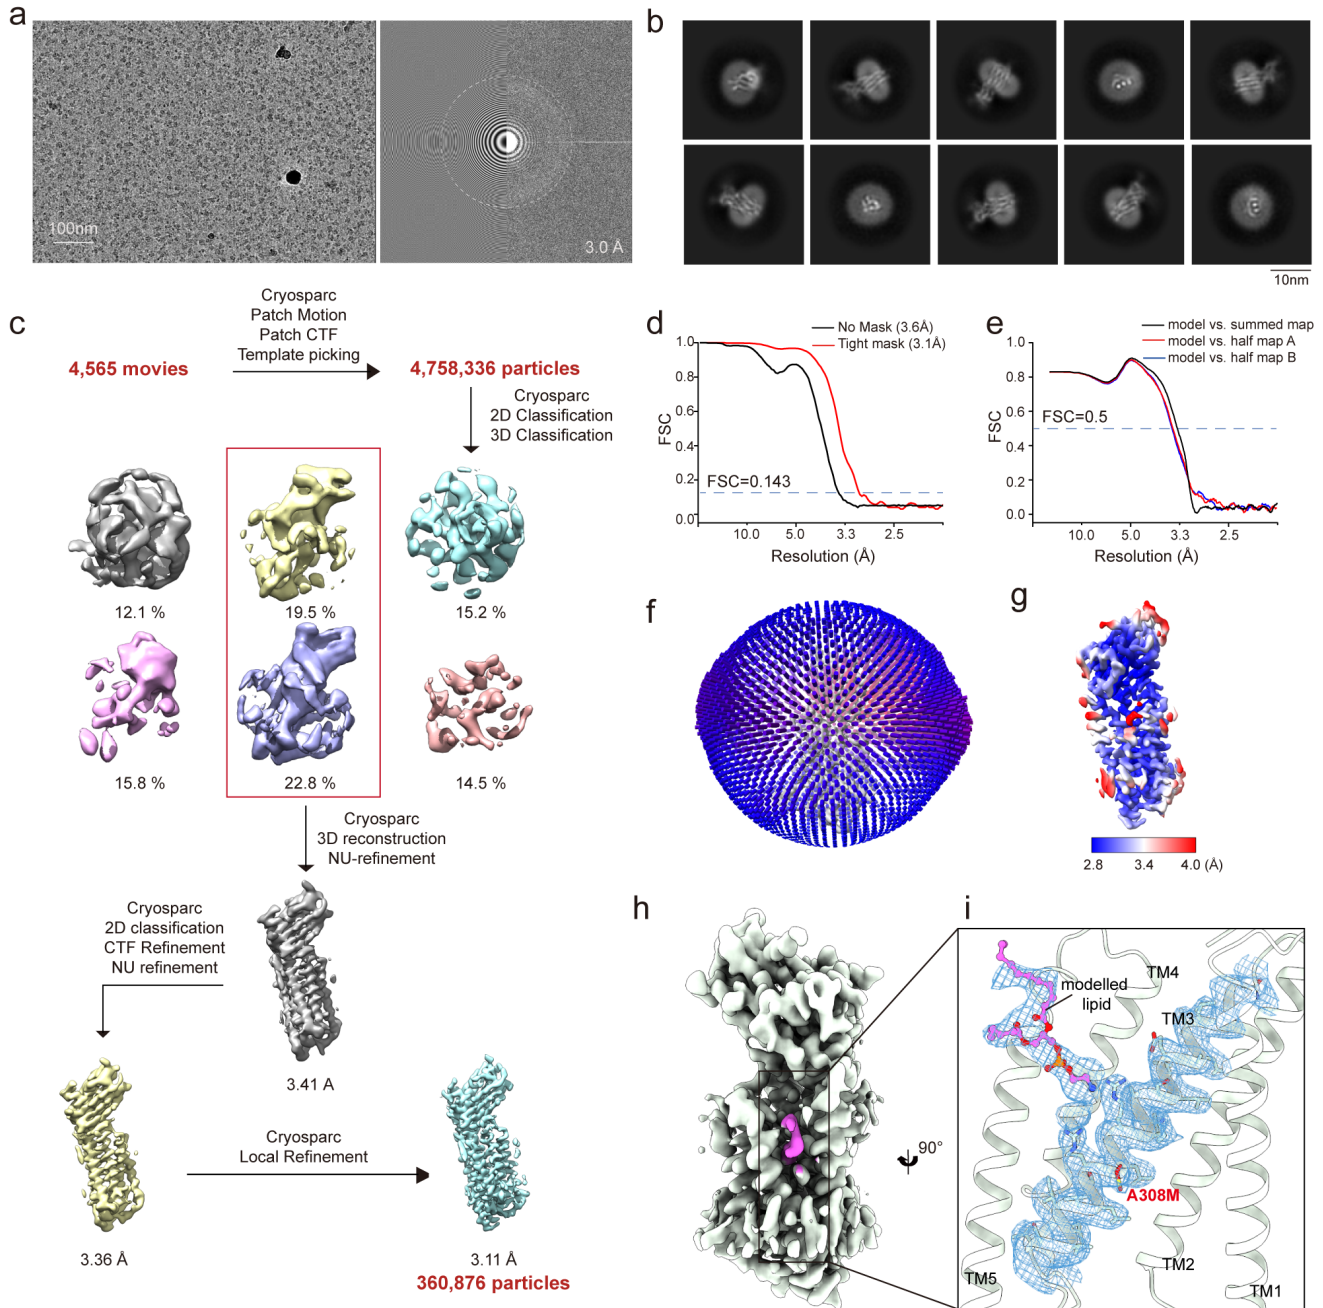

### Supplementary Fig.7 | Cryo-EM analysis of hTMEM87A A308M

- a, Representative cryo-EM micrograph (left) and its Fourier transform (right) of the hTMEM87A A308M.
- b, Representative 2D class averages of hTMEM87A-A308M.
- c, Data processing workflow of cryo-EM analysis of hTMEM87A-A308M.
- d, Fourier shell correlation (FSC) curves between two independently refined half maps in cryoSPARC (left, resolution cutoff at FSC = 0.143).
- e, FSC curves for cross-validation of a model (right, resolution cutoff at FSC = 0.5).

- f**, Euler angle distribution of all particles used in the final 3D reconstructions. The cylinder bars' height and color (from blue to red) are proportional to the number of particles in those views.
- g**, Final cryo-EM map of hTMEM87A A308M colored with local resolution.
- h**, Cryo-EM map and model of hTMEM87A A308M. Overall cryo-EM density map of hTMEM87A A308M (contour level = 0.101) is displayed with the same view in Fig.3g. The density of the lipid is shown in pink.
- i**, Model fit to the cryo-EM map in the lipid binding site of hTMEM87A A308M. Densities of lipid and TM3 are shown (contour level = 0.085). A modeled lipid is shown as pink sticks. The A308M mutation is highlighted in red.

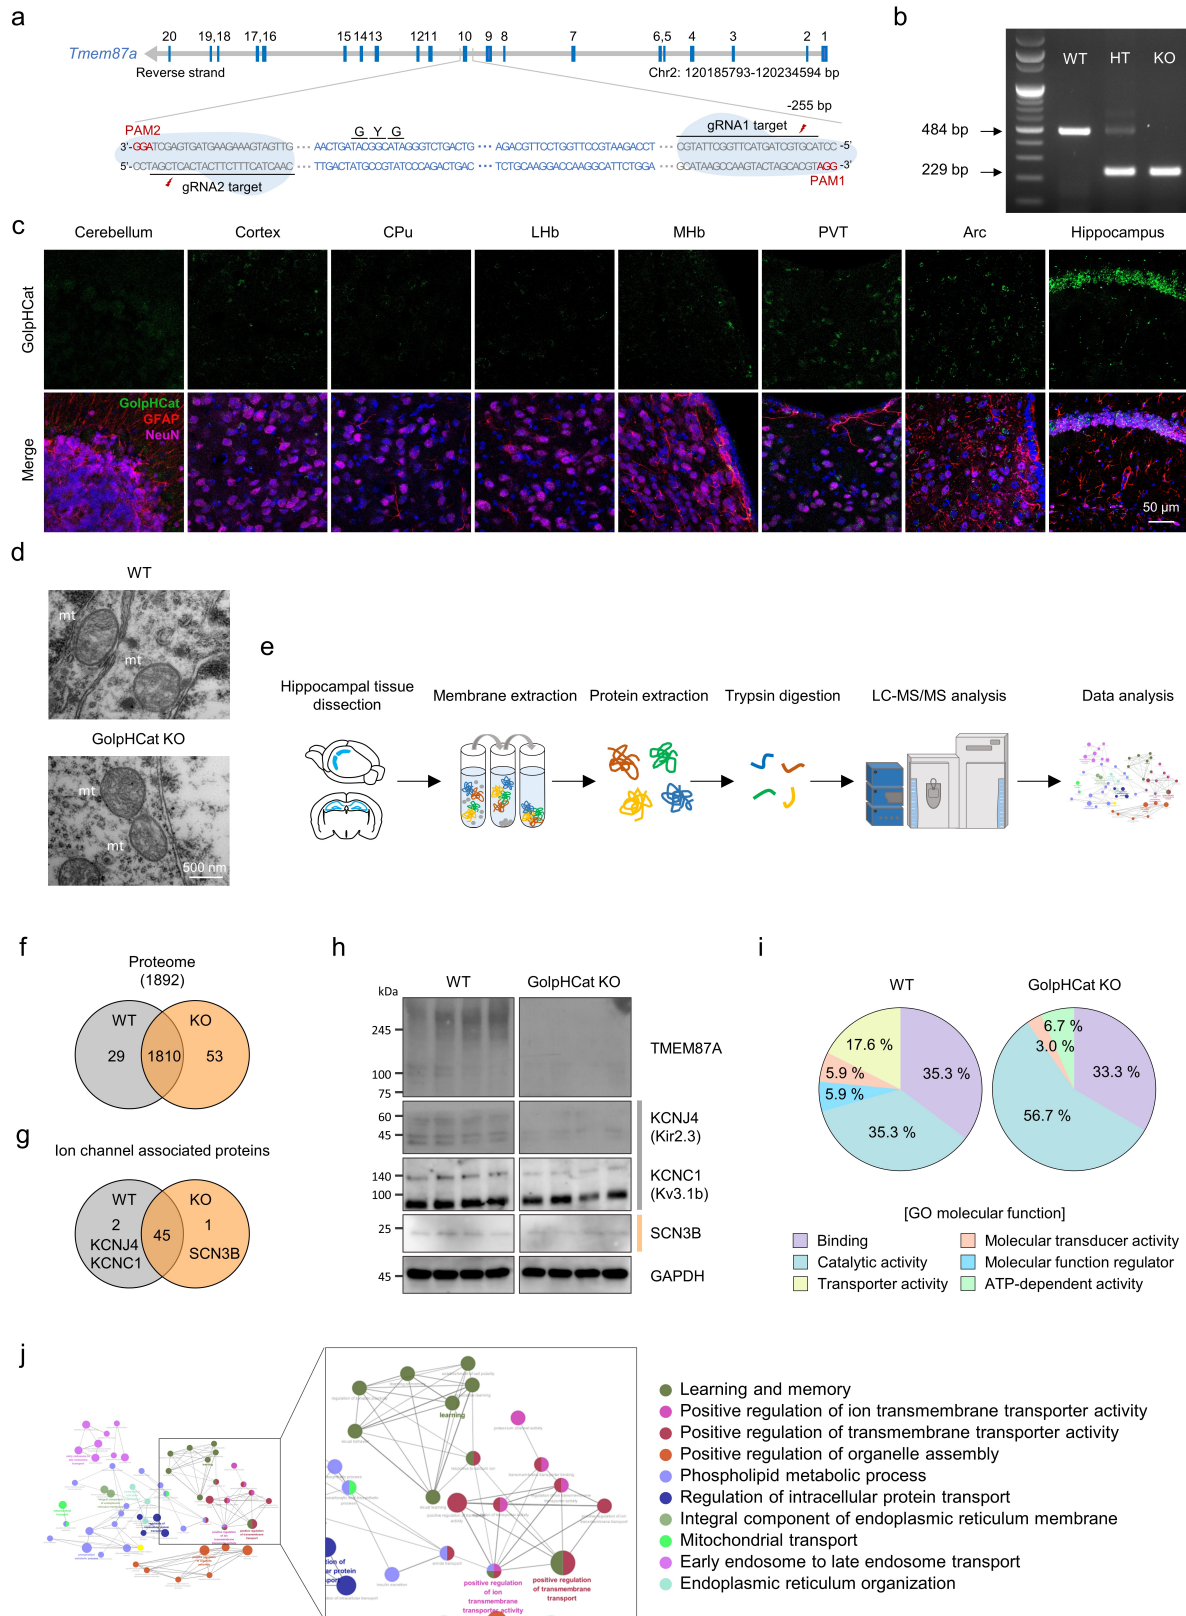

**Supplementary Fig.8 | Generation of GolpHCat KO mice and altered biological functions in GolpHCat KO mice**



- a**, Schematic diagram of *Tmem87a* genetic locus on the reverse strand of mouse chromosome 2. Exons are indicated with a blue box with a number, and introns are indicated by a gray line (top). The target genomic locus of two gRNAs on introns 9 and 10 are noted in blue, with the protospacer adjacent motif (PAM) in red (bottom).
- b**, Representative PCR Genotyping result of wild-type, GolpHCat heterozygote and homozygote mice. Representative figures were obtained from five independent experiment.
- c**, GolpHCat expression in various brain regions including cerebellum, cortex, caudate putamen (CPu), lateral habenula (LHb), medial habenula (MHb), paraventricular thalamic nucleus (PVT), and arcuate hypothalamus (Arc). Representative figures were obtained from three independent experiment.
- d**, Representative TEM images of the mitochondria in WT and GolpHCat KO mice (n=4cells from 3mice).
- e**, Workflow of proteomics analysis with hippocampus sample.
- f**, Venn diagram comparison of identified proteins in hippocampus of WT (n=3) versus GolpHCat KO (n=3).
- g**, Venn diagram comparison of identified ion channel associated proteins in hippocampus of WT versus GolpHCat KO.
- h**, Western blotting of GolpHCat and identified ion channel associated proteins in hippocampus of WT (n=4) versus GolpHCat KO (n=4)
- i**, Gene Ontology (GO) term analysis with the differentially expressed proteins of WT and GolpHCat KO. Pie chart depicting the percentage of involvement of identified proteins and their molecular functions.
- j**, Network clusters performed with differentially expressed proteins of WT and GolpHCat KO in Cytoscape using ClueGO and CluePedia. The size of the nodes corresponds to the number of proteins associated to a term.
- Source data are provided as a Source Data file.

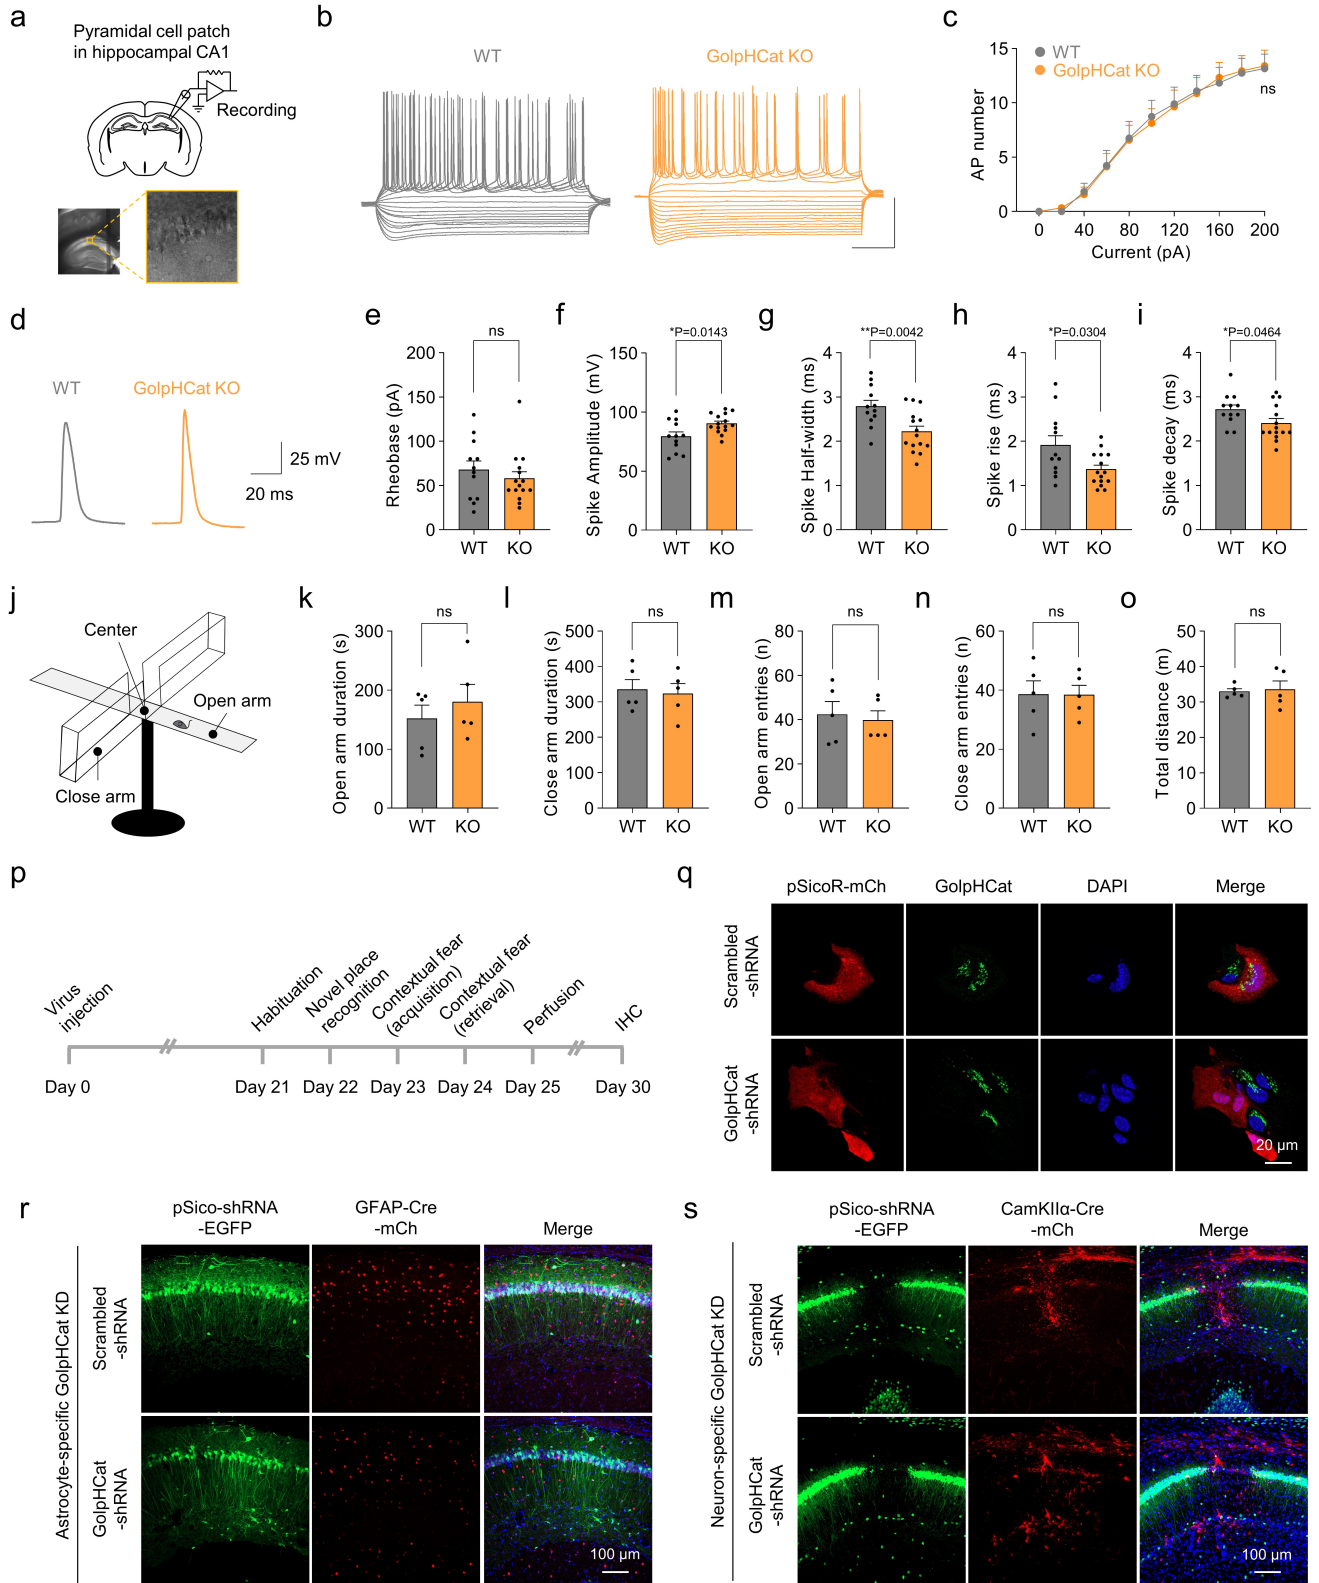

**Supplementary Fig.9 | Intrinsic properties of TMEM87A KO and cell-type specific gene silencing for behavioral tests**

- a**, Schematic diagram of a slice patch from WT and GolpHCat KO mice (top) and magnified differential interference contrast (DIC) image of a whole-cell patch-clamped CA1 pyramidal neuron in the hippocampus (bottom).
- b**, Representative action potential traces in the CA1 pyramidal neurons in WT (n=12 from 3 mice) and GolpHCat KO (n=15 from 3 mice) mice. Scale bar: 50 mV and 200 ms.
- c**, Spike (action potential) number under the depolarizing current step protocol (from 0 pA to +200 pA, 20 pA step) in the CA1 pyramidal neurons in WT (n=12 from 3 mice) and GolpHCat KO (n=15 from 3 mice) mice.
- d**, Representative single action potential traces of WT (n=12 from 3 mice) and GolpHCat KO (n=15 from 3 mice) mice.
- e-l**, Bar graph of rheobase (e), spike amplitude (f), spike half-width (g), spike rise (h), and spike decay (i) of WT (n=12 from 3 mice) and GolpHCat KO (n=15 from 3 mice) mice.
- j**, Schematic diagram of the elevated plus maze (EPM).
- k-o**, Bar graph of open arm duration (k), close arm duration (l), open arm entries (m), close arm entries (n), and total distance (o) in elevated plus maze test of WT (n=5) and GolpHCat KO (n=5) mice.
- p**, Experimental timeline for virus injection, behavior tests, and IHC.
- q**, Immunostaining of GolpHCat in the scrambled shRNA or TMEM87A shRNA microperated cultured hippocampal astrocytes for confirming the efficiency of GolpHCat shRNA. Representative figures were obtained from three independent experiment.
- r**, Fluorescence images in AAV-GFAP-cre-mCh + Lenti-pSico-Scrambled (n=9mice)/ GolpHCat shRNA (n=9mice)-EGFP virus-injected mice.
- s**, Fluorescence images in AAV-CamKII-cre-mCh + Lenti-pSico-Scrambled (n=8mice)/ GolpHCat shRNA (n=10mice)-EGFP virus-injected mice.

Data are presented as the mean  $\pm$  SEM. Statistical analyses were performed using two-way ANOVA followed by Holm-Šídák's multiple comparisons test in (c), Mann-Whitney test in (e and k-o), two-tailed unpaired t-test in (f), (g), and (i), unpaired t-test with Welch's correction (h). Source data and exact p values are provided as a Source Data file.

**Supplementary Table 1.** Mass spectrometry of the purified EGFP-tagged TMEM87A solution

| Protein names                                                    | Sequence coverage [%] | Unique peptides | LFQ intensity (Sample 1) | LFQ intensity (Sample 2) | LFQ intensity (Sample 3) | % of LFQ intensity relative to TMEM87A (Sample 1) | % of LFQ intensity relative to TMEM87A (Sample 2) | % of LFQ intensity relative to TMEM87A (Sample 3) |
|------------------------------------------------------------------|-----------------------|-----------------|--------------------------|--------------------------|--------------------------|---------------------------------------------------|---------------------------------------------------|---------------------------------------------------|
| Transmembrane protein 87A                                        | 38.2                  | 17              | 384360000                | 384130000                | 438130000                | 100                                               | 100                                               | 100                                               |
| Calnexin                                                         | 29.1                  | 18              | 308190000                | 311120000                | 325550000                | 8.018264                                          | 8.099341                                          | 7.430443                                          |
| Heat shock 70 kDa protein 1A;Heat shock 70 kDa protein 1B        | 49.1                  | 11              | 304680000                | 278460000                | 305920000                | 7.926943                                          | 7.249108                                          | 6.982402                                          |
| Heat shock cognate 71 kDa protein                                | 59.1                  | 23              | 222450000                | 207420000                | 240420000                | 5.787543                                          | 5.399734                                          | 5.487412                                          |
| Ubiquitin-60S ribosomal protein L40;                             | 35.2                  | 4               | 149390000                | 137980000                | 157380000                | 3.886721                                          | 3.592013                                          | 3.592085                                          |
| Heat shock 70 kDa protein 1-like                                 | 24                    | 2               | 104070000                | 97057000                 | 103330000                | 2.707618                                          | 2.526671                                          | 2.358432                                          |
| Poly(ADP-ribose) glycohydrolase                                  | 1.1                   | 1               | 96131000                 | 130210000                | 108280000                | 2.501067                                          | 3.389738                                          | 2.471413                                          |
| Vascular endothelial growth factor C                             | 8                     | 3               | 46361000                 | 45273000                 | 46274000                 | 1.206187                                          | 1.178585                                          | 1.056171                                          |
| Vascular endothelial growth factor receptor 3                    | 3.2                   | 4               | 38250000                 | 34194000                 | 35565000                 | 0.995161                                          | 0.890167                                          | 0.811745                                          |
| Tubulin alpha-1C chain;Tubulin alpha-8 chain                     | 41.4                  | 1               | 15071000                 | 14847000                 | 15578000                 | 0.392106                                          | 0.38651                                           | 0.355557                                          |
| VIP36-like protein                                               | 18.7                  | 6               | 14925000                 | 14209000                 | 16089000                 | 0.388308                                          | 0.369901                                          | 0.36722                                           |
| Histone H4                                                       | 29.1                  | 3               | 8314500                  | 8149600                  | 10355000                 | 0.216321                                          | 0.212157                                          | 0.236345                                          |
| 78 kDa glucose-regulated protein                                 | 40                    | 18              | 8171600                  | 7793100                  | 8438600                  | 0.212603                                          | 0.202877                                          | 0.192605                                          |
| Calmegin                                                         | 3.6                   | 1               | 7736800                  | 6473500                  | 8605100                  | 0.20129                                           | 0.168524                                          | 0.196405                                          |
| Tubulin beta-5 chain;Tubulin beta-2B chain;Tubulin beta-2A chain | 41.4                  | 4               | 5992500                  | 6312500                  | 6596400                  | 0.155909                                          | 0.164332                                          | 0.150558                                          |
| Vesicular integral-membrane protein VIP36                        | 17.9                  | 5               | 5978200                  | 6268600                  | 6919500                  | 0.155536                                          | 0.16319                                           | 0.157933                                          |
| Histone H2A type 1                                               | 26.9                  | 3               | 5627100                  | 5018100                  | 5529900                  | 0.146402                                          | 0.130635                                          | 0.126216                                          |
| Histone H2B type 1                                               | 14.3                  | 2               | 4563300                  | 4210100                  | 4814100                  | 0.118725                                          | 0.109601                                          | 0.109878                                          |
| Stress-70 protein, mitochondrial                                 | 34.5                  | 16              | 4180400                  | 3939700                  | 4417700                  | 0.108763                                          | 0.102562                                          | 0.100831                                          |
| Voltage-dependent anion-selective channel protein 1              | 26                    | 5               | 3393600                  | 3137200                  | 3168500                  | 0.088292                                          | 0.08167                                           | 0.072319                                          |
| Voltage-dependent anion-selective channel protein 2              | 28.5                  | 6               | 3028300                  | 2867600                  | 3151500                  | 0.078788                                          | 0.074652                                          | 0.071931                                          |
| RuvB-like 1                                                      | 30.5                  | 10              | 2249400                  | 2001800                  | 2228600                  | 0.058523                                          | 0.052113                                          | 0.050866                                          |
| Acetyl-CoA carboxylase 1;Biotin carboxylase                      | 15.3                  | 25              | 2171600                  | 2022800                  | 2352700                  | 0.056499                                          | 0.052659                                          | 0.053699                                          |
| Actin, cytoplasmic 2                                             | 11.5                  | 3               | 2103500                  | 1864400                  | 2185700                  | 0.054727                                          | 0.048536                                          | 0.049887                                          |
| Membrane-associated progesterone receptor component 1 and 2      | 8.7                   | 2               | 1859200                  | 1574900                  | 1821700                  | 0.048371                                          | 0.040999                                          | 0.041579                                          |
| Beta-1,4-glucuronyltransferase 1                                 | 19.5                  | 6               | 1828500                  | 1718300                  | 1618500                  | 0.047573                                          | 0.044732                                          | 0.036941                                          |
| Hemoglobin subunit alpha;Hemoglobin subunit zeta                 | 13.4                  | 1               | 1803100                  | 1513500                  | 1575700                  | 0.046912                                          | 0.039401                                          | 0.035964                                          |
| 60S ribosomal protein L23                                        | 14.3                  | 1               | 1613000                  | 2092500                  | 2110200                  | 0.041966                                          | 0.054474                                          | 0.048164                                          |
| Propionyl-CoA carboxylase beta chain, mitochondrial              | 15.3                  | 6               | 1550000                  | 1497200                  | 1663700                  | 0.040327                                          | 0.038976                                          | 0.037973                                          |
| RuvB-like 2                                                      | 14.7                  | 6               | 1528000                  | 1442000                  | 1599800                  | 0.039754                                          | 0.037539                                          | 0.036514                                          |
| S-phase kinase-associated protein 1                              | 29.4                  | 3               | 1301300                  | 1205200                  | 1219500                  | 0.033856                                          | 0.031375                                          | 0.027834                                          |
| Ras-related protein Rab-7a                                       | 28.5                  | 5               | 1201500                  | 1227600                  | 1339700                  | 0.03126                                           | 0.031958                                          | 0.030578                                          |
| Sarcoplasmic/endoplasmic reticulum calcium ATPase 2              | 6.3                   | 4               | 1185800                  | 1168500                  | 1327300                  | 0.030851                                          | 0.030419                                          | 0.030295                                          |
| Transmembrane protein 43                                         | 10.8                  | 2               | 1092400                  | 1086200                  | 788910                   | 0.028421                                          | 0.028277                                          | 0.018006                                          |
| Ras-related protein Rab-6B;Ras-related protein Rab-6A            | 10.6                  | 1               | 1011400                  | 985770                   | 1188300                  | 0.026314                                          | 0.025662                                          | 0.027122                                          |
| Maternal embryonic leucine zipper kinase                         | 1.7                   | 1               | 952870                   | 0                        | 1004300                  | 0.024791                                          | 0                                                 | 0.022922                                          |
| Ras-related protein Rab-2A;Ras-related protein Rab-2B            | 24.1                  | 4               | 943340                   | 827780                   | 920200                   | 0.024543                                          | 0.021549                                          | 0.021003                                          |
| Poly(rC)-binding protein 2;Poly(rC)-binding protein 3            | 10.5                  | 3               | 915720                   | 839080                   | 911690                   | 0.023825                                          | 0.021844                                          | 0.020809                                          |
| Protein FAM3A                                                    | 11.3                  | 2               | 873680                   | 827680                   | 933800                   | 0.022731                                          | 0.021547                                          | 0.021313                                          |
| Synaptojanin-2-binding protein                                   | 24.8                  | 3               | 841120                   | 827790                   | 789730                   | 0.021884                                          | 0.02155                                           | 0.018025                                          |
| Neutral alpha-glucosidase AB                                     | 2.2                   | 2               | 787110                   | 772720                   | 820150                   | 0.020478                                          | 0.020116                                          | 0.018719                                          |
| Endoplasmic                                                      | 3.7                   | 2               | 728580                   | 777130                   | 800330                   | 0.018956                                          | 0.020231                                          | 0.018267                                          |
| Pyruvate carboxylase, mitochondrial                              | 4.3                   | 3               | 695950                   | 614520                   | 788160                   | 0.018107                                          | 0.015998                                          | 0.017989                                          |

**Supplementary Table 2.** Cryo-EM data collection, refinement, and validation statistics

|                                                     | #1 hTMEM87A<br>(EMDB-34998)<br>(PDB-8HSI) | #2 hTMEM87A-Gluc<br>(EMDB-35017)<br>(PDB-8HTT) | #2 hTMEM87A-<br>A308M<br>(EMDB-37069)<br>(PDB-8KB4) |
|-----------------------------------------------------|-------------------------------------------|------------------------------------------------|-----------------------------------------------------|
| <b>Data collection and processing</b>               |                                           |                                                |                                                     |
| Magnification                                       | 105,000x                                  | 105,000x                                       | 105,000x                                            |
| Voltage (kV)                                        | 300                                       | 300                                            | 300                                                 |
| Electron exposure (e <sup>-</sup> /Å <sup>2</sup> ) | 67.72                                     | 68.1                                           | 67.7                                                |
| Defocus range (μm)                                  | -0.8—1.9                                  | -0.8—1.9                                       | -0.7—1.7                                            |
| Pixel size (Å)                                      | 0.849                                     | 0.849                                          | 0.848                                               |
| Symmetry imposed                                    | C1                                        | C1                                             | C1                                                  |
| Initial particle images (no.)                       | 8,101,104                                 | 6,035,205                                      | 4,758,336                                           |
| Final particle images (no.)                         | 445,198                                   | 201,915                                        | 360,876                                             |
| Map resolution (Å)                                  | 3.14                                      | 3.6                                            | 3.12                                                |
| FSC threshold                                       | 0.143                                     | 0.143                                          | 0.143                                               |
| Map resolution range (Å)                            |                                           |                                                |                                                     |
| <b>Refinement</b>                                   |                                           |                                                |                                                     |
| Initial model used (PDB code)                       | -                                         | 8HSI                                           | 8HSI                                                |
| Model resolution (Å)                                |                                           |                                                |                                                     |
| FSC threshold                                       | 0/0.143/0.5                               | 0/0.143/0.5                                    | 0/0.143/0.5                                         |
| Model resolution range (Å)                          | 3.0/3.1/3.3                               | 3.4/3.5/3.9                                    | 3.0/3.1/3.4                                         |
| Map sharpening <i>B</i> factor (Å <sup>2</sup> )    | 40.0                                      | 65.00                                          | 35.0                                                |
| <b>Model composition</b>                            |                                           |                                                |                                                     |
| Non-hydrogen atoms                                  | -                                         | -                                              | -                                                   |
| Protein residues                                    | 405                                       | 389                                            | 402                                                 |
| Ligands                                             | BMA:1, NAG:6,<br>CLR:2, L9Q:1             | BMA:1, NAG:6,<br>GCO:1                         | NAG:3,<br>65I:1                                     |
| <b><i>B</i> factors (Å<sup>2</sup>)</b>             |                                           |                                                |                                                     |
| Protein                                             | 122.92                                    | 163.62                                         | 110.63                                              |
| Ligand                                              | 119.42                                    | 217.22                                         | 155.27                                              |
| <b>R.m.s. deviations</b>                            |                                           |                                                |                                                     |
| Bond lengths (Å)                                    | 0.028                                     | 0.003                                          | 0.004                                               |
| Bond angles (°)                                     | 0.880                                     | 0.713                                          | 0.585                                               |
| <b>Validation</b>                                   |                                           |                                                |                                                     |
| MolProbity score                                    | 2.05                                      | 2.11                                           | 2.18                                                |
| Clashscore                                          | 14.83                                     | 18.66                                          | 18.76                                               |
| Poor rotamers (%)                                   | 0.0                                       | 0.0                                            | 0.00                                                |
| <b>Ramachandran plot</b>                            |                                           |                                                |                                                     |
| Favored (%)                                         | 94.49                                     | 95.04                                          | 93.94                                               |
| Allowed (%)                                         | 5.51                                      | 4.96                                           | 6.06                                                |
| Disallowed (%)                                      | 0.0                                       | 0.0                                            | 0.0                                                 |

**Supplementary Table 3.** Differentially expressed proteins found in WT and GolpHCat KO using mass spectrometry

| <b>Differentially expressed proteins in WT</b>                |
|---------------------------------------------------------------|
| Lysocardiolipin acyltransferase 1                             |
| Aladin                                                        |
| Envoplakin                                                    |
| Rootletin                                                     |
| Protocadherin gamma-A4                                        |
| Sodium-dependent phosphate transporter 2                      |
| Long-chain specific acyl-CoA dehydrogenase, mitochondrial     |
| Endophilin-B1                                                 |
| Diacylglycerol kinase epsilon                                 |
| Phosphoenolpyruvate carboxykinase [GTP], mitochondrial        |
| Signal peptidase complex subunit 2                            |
| Metaxin-2                                                     |
| Copine-2                                                      |
| Adenylate kinase isoenzyme 1                                  |
| Potassium voltage-gated channel subfamily C member 1          |
| Paraplegin                                                    |
| Guanylate cyclase D                                           |
| Rho GTPase-activating protein 32                              |
| Inward rectifier potassium channel 4                          |
| Polypeptide N-acetylgalactosaminyltransferase 16              |
| Carboxypeptidase D                                            |
| A-kinase anchor protein 1, mitochondrial                      |
| Calcium signal-modulating cyclophilin ligand                  |
| Kelch repeat and BTB domain-containing protein 11             |
| Glypican-4;Secreted glypican-4;Glypican-6;Secreted glypican-6 |
| Annexin A1                                                    |
| Ig mu chain C region                                          |
| Abelson tyrosine-protein kinase 2                             |
| Zinc finger ZZ-type and EF-hand domain-containing protein 1   |

  

| <b>Differentially expressed proteins in GolpHCat KO</b>                                                   |
|-----------------------------------------------------------------------------------------------------------|
| TNF receptor-associated factor 3                                                                          |
| Ubiquitin-conjugating enzyme E2 D3;Ubiquitin-conjugating enzyme E2 D2;Ubiquitin-conjugating enzyme E2 D2B |
| Transmembrane protein 163                                                                                 |
| Transmembrane anterior posterior transformation protein 1                                                 |
| Selenoprotein T                                                                                           |
| Serine incorporator 1                                                                                     |
| Aspartyl/asparaginyl beta-hydroxylase                                                                     |
| Coiled-coil domain-containing protein 132                                                                 |
| Acyl-coenzyme A thioesterase 13;Acyl-coenzyme A thioesterase 13, N-terminally processed                   |
| DnaJ homolog subfamily A member 2                                                                         |
| Multidrug resistance protein 1A;Multidrug resistance protein 1B                                           |
| Rab-interacting lysosomal protein                                                                         |
| Serine/threonine-protein kinase PAK 1                                                                     |
| RNA-binding protein 14                                                                                    |

Sodium channel subunit beta-3  
Mitochondrial import inner membrane translocase subunit TIM16  
Serum paraoxonase/arylesterase 2  
ATPase Asna1  
CAAX prenyl protease 1 homolog  
Spermatogenesis-defective protein 39 homolog  
Type 1 phosphatidylinositol 4,5-bisphosphate 4-phosphatase  
Neuron-specific protein family member 2  
Phytanoyl-CoA hydroxylase-interacting protein  
ADP-ribosylation factor-like protein 6-interacting protein 1  
NADH dehydrogenase [ubiquinone] iron-sulfur protein 6, mitochondrial  
Tumor protein D52  
Leukocyte elastase inhibitor A  
Sepiapterin reductase  
Serine/threonine-protein kinase B-raf;RAF proto-oncogene serine/threonine-protein kinase  
Calcium-independent phospholipase A2-gamma  
GTP-binding protein Di-Ras1  
Inactive phospholipase C-like protein 2  
TOM1-like protein 2  
Presqualene diphosphate phosphatase  
Transmembrane 9 superfamily member 4  
Kv channel-interacting protein 4;Kv channel-interacting protein 1  
Lipid phosphate phosphatase-related protein type 3  
Heterogeneous nuclear ribonucleoprotein A1;Heterogeneous nuclear ribonucleoprotein A1, N-terminally processed  
Constitutive coactivator of PPAR-gamma-like protein 1  
Multifunctional protein ADE2;Phosphoribosylaminoimidazole-succinocarboxamide synthase;Phosphoribosylaminoimidazole carboxylase  
Probable ATP-dependent RNA helicase DDX17  
Sorting nexin-2  
Moesin  
MAP/microtubule affinity-regulating kinase 4  
Alpha-(1,6)-fucosyltransferase  
Amyloid beta A4 precursor protein-binding family B member 1  
Protein S100-B  
Plexin-A2  
Protein kinase C delta type;Protein kinase C delta type regulatory subunit;Protein kinase C delta type catalytic subunit  
Microtubule-associated serine/threonine-protein kinase 3  
Huntingtin  
Isoleucine--tRNA ligase, cytoplasmic  
Diacylglycerol kinase gamma

---

**Supplementary Table 4. Constructs for recombinant protein expression**

| <b>Construct</b>                | <b>Expression vector</b> | <b>Information</b>                                                                            |
|---------------------------------|--------------------------|-----------------------------------------------------------------------------------------------|
| hTMEM87A-WT-GFP-Strep           | pcDNA3.4 TOPO            | HindIII-hTMEM87A-WT (M1-E555)-TEV site-3C site-EGFP(-)-thrombin site-Twin-Strep-tag-stop-XhoI |
| hTMEM87A-WT                     | pIRES2-DsRed             | Sall-hTMEM87A-WT (M1-E555)-BamHI                                                              |
| hTMEM87A-AAA<br>(GYG318~320AAA) | pIRES2-DsRed             | Sall-hTMEM87A-AAA (M1-E555)-BamHI                                                             |
| hTMEM87A-Y237A                  | pIRES2-DsRed             | Sall-hTMEM87A-Y237A (M1-E555)-BamHI                                                           |
| hTMEM87A-E272A                  | pIRES2-DsRed             | Sall-hTMEM87A-E272A (M1-E555)-BamHI                                                           |
| hTMEM87A-K273A                  | pIRES2-DsRed             | Sall-hTMEM87A-K273A (M1-E555)-BamHI                                                           |
| hTMEM87A-E279A                  | pIRES2-DsRed             | Sall-hTMEM87A-E279A (M1-E555)-BamHI                                                           |
| hTMEM87A-E298A                  | pIRES2-DsRed             | Sall-hTMEM87A-E298A (M1-E555)-BamHI                                                           |
| hTMEM87A-S301A                  | pIRES2-DsRed             | Sall-hTMEM87A-S301A (M1-E555)-BamHI                                                           |
| hTMEM87A-K304A                  | pIRES2-DsRed             | Sall-hTMEM87A-K304A (M1-E555)-BamHI                                                           |
| hTMEM87A-R305A                  | pIRES2-DsRed             | Sall-hTMEM87A-R305A (M1-E555)-BamHI                                                           |
| hTMEM87A-R309A                  | pIRES2-DsRed             | Sall-hTMEM87A-R309A (M1-E555)-BamHI                                                           |
| hTMEM87A-A308M                  | pIRES2-DsRed             | Sall-hTMEM87A- A308M (M1-E555)-BamHI                                                          |
| hTMEM87A-R257A/R325A            | pIRES2-DsRed             | Sall-hTMEM87A- R257A/R325A (M1-E555)-BamHI                                                    |
| hTMEM87A-E288R                  | pIRES2-DsRed             | Sall-hTMEM87A- E288R (M1-E555)-BamHI                                                          |
| hTMEM87A-D442A                  | pIRES2-DsRed             | Sall-hTMEM87A-D442A (M1-E555)-BamHI                                                           |



**Supplementary Table 5. Primer sequences used for cloning**

| Primer                                             | Sequence (5'–3')                                                                       |
|----------------------------------------------------|----------------------------------------------------------------------------------------|
| hTMEM87A-WT-GFP-strep-Foward                       | TTC TCT CCA CAG AAG CTT ATG GCG GCG GCT GCG TGG CT                                     |
| hTMEM87A-WT-GFP-strep-Reverse                      | GTA CAG GTT TTC CTT AAG CTC CAT TTT GGA CCT TTC AAA GTG TGT GAT CAT TCG T              |
| hTMEM87A-WT-Forward                                | TCG AAT TCT GCA GTC GAC ATG GCG GCG GCT GCG TGG CT                                     |
| hTMEM87A-WT-Reverse                                | AGG GAG AGG GGC GGA TCC CTC CAT TTT GGA CCT TTC AAA GTG TGT GAT CAT TCG T              |
| hTMEM87A-isoform1-(GGSX3)-EGFP-Forward             | AGC TCA AGC TTC GAA TTC GCC ACC ATG GCG GCG GCT GCG TGG CTT                            |
| hTMEM87A-isoform1-(GGSX3)-EGFP-Reverse             | ACC ATG GTG GCG ACC GGT GAT CCG CCG CTT CCG CCG CTT CCG CCC TCC ATT TTG GAC CTT TCA AA |
| hTMEM87A-isoform3-(GGSX3)-EGFP-Forward             | AGC TCA AGC TTC GAA TTC GCC ACC ATG GCA CAT TCC GAT ACC GT                             |
| hTMEM87A-isoform3-(GGSX3)-EGFP-Reverse             | ACC ATG GTG GCG ACC GGT GAT CCG CCG CTT CCG CCG CTT CCG CCC TCC ATT TTG GAC CTT TCA AA |
| mTMEM87A-WT-Forward                                | TCG AAT TCT GCA GTC GAC ATG GCT GTG AAG ATG GCG GT                                     |
| mTMEM87A-WT-Reverse                                | AGG GAG AGG GGC GGA TCC TTA CTC CAT CTT TGA CCT TT                                     |
| hTMEM87A-isoform1 $\Delta$ ss-(GGSX3)-EGFP-Forward | TCA CCA CTG TCG TTT TTC AGT GCG                                                        |
| hTMEM87A-isoform1 $\Delta$ ss-(GGSX3)-EGFP-Reverse | CAT GGT GGC GAA TTC GGA GCT                                                            |
| shRNA-insensitive hTMEM87A WT-Forward              | TAT ATT CTT GGG AAT GCT TGA GAA AG                                                     |
| shRNA-insensitive hTMEM87A WT-Reverse              | ACG GCG CCG ATC CAA AAC TGA ATT CTC                                                    |
| hTMEM87A-AAA-Forward<br>(GYG318~320AAA)            | AGC AAT CGT CAA GCC ACG CCT T                                                          |
| hTMEM87A-AAA-Reverse<br>(GYG318~320AAA)            | GCT GCC AGA CTG ACT ATG ATG A                                                          |
| hTMEM87A-Y237A-Forward                             | GTG ATG TGT ATT GTA GCT GTC CTG TTT GGT GTT CT                                         |
| hTMEM87A-Y237A-Reverse                             | AGA ACA CCA AAC AGG ACA GCT ACA ATA CAC ATC AC                                         |

|                        |                                             |
|------------------------|---------------------------------------------|
| hTMEM87A-E272A-Forward | CTG GGA ATG CTT GAG AAA GCT GTC TTC         |
| hTMEM87A-E272A-Reverse | GAA GAC AGC TTT CGC AAG CAT TCC CAG         |
| hTMEM87A-K273A-Forward | GGA ATG CTT GAG AAA GCT GTC TTC TAT         |
| hTMEM87A-K273A-Reverse | ATA GAA GAC AGC TGC CTC AAG CAT TCC         |
| hTMEM87A-E279A-Forward | GTC TTC TAT GCG GCA TTT CAG AAT ATC CGA TAC |
| hTMEM87A-E279A-Reverse | GTA TCG GAT ATT CTG AAA TGC CGC ATA GAA GAC |
| hTMEM87A-E298A-Forward | TTG ATC CTT GCA GCG CTG CTT TCA GCA         |
| hTMEM87A-E298A-Reverse | TGC TGA AAG CAG CGC TGC AAG GAT CAA         |
| hTMEM87A-S301A-Forward | GCA GAG CTG CTT GCA GCA GTG AAA CGC         |
| hTMEM87A-S301A-Reverse | GCG TTT CAC TGC TGC AAG CAG CTC TGC         |
| hTMEM87A-K304A-Forward | CTT TCA GCA GTG AAA CGC TCA CTG GCT         |
| hTMEM87A-K304A-Reverse | AGC CAG TGA GCG TGC CAC TGC TGA AAG         |
| hTMEM87A-R305A-Forward | TCA GCA GTG AAA GCC TCA CTG GCT CGA         |
| hTMEM87A-R305A-Reverse | TCG AGC CAG TGA GGC TTT CAC TGC TGA         |
| hTMEM87A-R309A-Forward | CGC TCA CTG GCT GCA ACC CTG GTC ATC         |
| hTMEM87A-R309A-Reverse | GAT GAC CAG GGT TGC AGC CAG TGA GCG         |
| hTMEM87A-A308M-Forward | AAA CGC TCA CTG ATG CGA ACC CTG GTC         |
| hTMEM87A-A308M-Reverse | GAC CAG GGT TCG CAT CAG TGA GCG TTT         |
| hTMEM87A-R257A-Forward | AGA GAT CTC CTG GCA ATT CAG TTT TGG         |
| hTMEM87A-R257A-Reverse | CCA AAA CTG AAT TGC CAG GAG ATC TCT         |
| hTMEM87A-R325A-Forward | ATC GTC AAG CCA GCC CTT GGA GTC ACT         |
| hTMEM87A-R325A-Reverse | AGT GAC TCC AAG GGC TGG CTT GAC GAT         |
| hTMEM87A-E288R-Forward | CGA TAC AAA GGA CGA TCT GTC CAG GGT         |
| hTMEM87A-E288R-Reverse | ACC CTG GAC AGA TCG TCC TTT GTA TCG         |
| hTMEM87A-D442A-Forward | CTG TGG GTA GAC GAT GCC ATC TGG CGC         |
| hTMEM87A-D442A-Reverse | GCG CCA GAT GGC AGC GTC TAC CCA CAG         |

---
