# Supplementary material for: GolpHCat (TMEM87A), a unique voltage-dependent cation channel in Golgi apparatus, contributes to Golgi-pH maintenance and hippocampus-dependent memory
Source: PubMed Central journal article supplement (PMC11239671; doi:10.1038/s41467-024-49297-8), 2024-07-11
Supplement: 41467_2024_49297_MOESM3_ESM.pdf [file 41467_2024_49297_MOESM3_ESM.pdf]

## Description of Additional Supplementary Files

### **GolpHCat (TMEM87A), a unique voltage-dependent cation channel in Golgi apparatus, contributes to Golgi-pH maintenance and hippocampus-dependent memory**

Hyunji Kang,<sup>1,2,7</sup> Ah-reum Han,<sup>3,7</sup> Aihua Zhang,<sup>4</sup> Heejin Jeong,<sup>5</sup> Wuhyun Koh,<sup>1</sup> Jung Moo Lee,<sup>1</sup> Hayeon Lee,<sup>1</sup> Hee Young Jo,<sup>5</sup> Miguel A. Maria-Solano,<sup>4</sup> Mridula Bhalla,<sup>1</sup> Jea Kwon,<sup>1</sup> Woo Suk Roh,<sup>1</sup> Hyun Jun Jang,<sup>1</sup> Jimin Yang,<sup>3</sup> Boyoung Lee,<sup>1</sup> Sun Choi,<sup>4</sup> Hyun Joo An,<sup>5</sup> Ho Min Kim,<sup>3,6,\*</sup> C. Justin Lee<sup>1,2,8,\*</sup>

<sup>7</sup> These authors contributed equally: Hyunji Kang, Ah-reum Han.

\*Correspondence: cjl@ibs.re.kr (C.J.L.), hm\_kim@kaist.ac.kr (H.M.K.)

**File Name:** Supplementary Data 1

**Description:** Initial structures of the K<sup>+</sup> conformational dynamics of hTMEM87A obtained from GaMD simulations (frame 1491).

**File Name:** Supplementary Data 2

**Description:** Final structures of the K<sup>+</sup> conformational dynamics of hTMEM87A obtained from GaMD simulations (frame 1846).

**File Name:** Supplementary Data 3

**Description:** Initial structure of PE binding simulations of hTMEM87A (S1).

**File Name:** Supplementary Data 4

**Description:** Final structure of PE binding simulations of hTMEM87A (S7).
